# Supplementary material for: Global ocean dimethyl sulfide climatology estimated from observations and an artificial neural network
Source: Copernicus journal article supplement (doi:10.5194/bg-2020-72), 2020-03-11
Supplement: Supplementary file [file bg-2020-72-AC4-supplement.pdf]

# Global ocean dimethyl sulfide climatology estimated from observations and an artificial neural network

Wei-Lei Wang<sup>1</sup>, Guisheng Song<sup>2</sup>, François Primeau<sup>1</sup>, Eric S. Saltzman<sup>1,3</sup>, Thomas G. Bell<sup>1,4</sup>, and J. Keith Moore<sup>1</sup>

<sup>1</sup>Department of Earth System Science, University of California at Irvine, Irvine, California, USA

<sup>2</sup>School of Marine Science and Technology, Tianjin University, Tianjin, 300072, China

<sup>3</sup>Department of Chemistry, University of California at Irvine, Irvine, California, USA

<sup>4</sup>Plymouth Marine Laboratory, Prospect Place, Plymouth, PL1 3DH, UK

**Correspondence:** Wei-Lei Wang (weilei.wang@gmail.com)

**Abstract.** Marine dimethyl sulfide (DMS) is important to climate due to the ability of DMS to alter Earth's radiation budget. Knowledge of the global-scale distribution, seasonal variability, and sea-to-air flux of DMS is needed in order to understand the factors controlling surface ocean DMS emissions. Here we examine the use of an artificial neural network (ANN) to extrapolate available DMS measurements to the global ocean and produce a global climatology with monthly temporal resolution. A global database of 82,996 ship-based DMS measurements in surface waters was used along with a suite of environmental parameters consisting of latitude-longitude coordinates, time-of-day, time-of-year, solar radiation, mixed layer depth, sea surface temperature, salinity, nitrate, phosphate, and silicate. Linear regressions of DMS against the environmental parameters show that on a global scale mixed layer depth and solar radiation are the strongest predictors of DMS. These parameters capture ~9% and ~7% of the raw DMS data variance, respectively. Multi-linear regression can capture more of the raw data variance (~39%), but strongly underestimates DMS in high concentrations regions. In contrast, the artificial neural network captures ~66% of the raw data variance in our database. Like prior climatologies our results show a strong seasonal cycle in surface ocean DMS with highest concentrations and sea to air fluxes in the high-latitude summertime oceans. We estimate a lower global sea-to-air DMS flux ( $20.12 \pm 0.43 \text{ Tg S yr}^{-1}$ ) than the prior estimate based on a map interpolation method (Lana et al., 2011) when the same gas transfer velocity parameterization is used.

## 1 Introduction

Dimethyl sulfide emitted from the surface ocean is the major precursor for aerosol sulfate in the marine atmosphere. These aerosols play a significant role in the climate system both directly, through aerosol radiative effects and indirectly, through their role as cloud condensation nuclei and influence on cloud radiative properties (Andreae and Rosenfeld, 2008). Assessing the impact of DMS on global climate requires an understanding of the seawater DMS distribution and the factors controlling variability on a variety of spatial and temporal scales. Dimethyl sulfide is produced in surface waters, mainly via enzymatic cleavage of the biogenic compound dimethyl sulfoniopropionate (DMSP; (e.g. Stefels et al., 2007)). The abundance of DMS in surface waters is a function of numerous factors controlling production, loss rates, and pathways of both DMSP and DMS

(Simó, 2001; Toole and Siegel, 2004; Galí et al., 2015). Developing mechanistic and predictive models of surface ocean DMS is challenging due to limitations of the existing observational database [and process rate measurements](#).

25 Given the biogenic origin of DMS, early efforts focused on the relationship between DMS and Chl *a* (a proxy for biomass). Positive correlations between DMS and Chl *a* have been reported on basin scales (e.g. Andreae and Barnard, 1984; Yang et al., 1999). However, this positive correlation disappears when more data are used. Kettle et al. (1999) found no significant relationship between DMS and Chl *a* based on the global DMS data set available at the time. [The weak relationship may be caused by the so-called “summer DMS paradox”, which describes a phenomenon that annual maximum of surface DMS concentration is commonly detected in summer when Chl \*a\* is at its annual minimum in mid and subtropical low latitude waters \(Simó and Pedrós-Alió, 1999\)](#). Kettle et al. (1999) also tested linear regression models on a compilation of data, including sea surface salinity and temperature, nitrate, silicate, phosphate, and Chl *a*. The authors then concluded that no simple algorithm based on linear regression could be used to create monthly DMS fields, indicating that more complex mechanisms can control surface DMS concentrations.

35 [Simó and Dachs \(2002\) achieved a strong linear relationship between heavily binned/averaged DMS and mixed layer depth \(MLD\) when Chl-\*a\*/MLD  \$\geq 0.02\$ , and a logarithmic relationship between DMS and Chl-\*a\*/MLD when Chl-\*a\*/MLD  \$< 0.02\$ .](#) Vallina and Simó (2007) found a linear relationship between DMS concentration and solar radiation dose (SRD) in the coastal northwestern Mediterranean. They conducted a global scale study by dividing the ocean into 10° latitude by 20° longitude boxes and correlating SRD and the box averaged DMS concentration. A strong linear relationship was detected in this filtered  
40 dataset. Derevianko et al. (2009) reexamined the relationship between SRD/MLD and DMS concentration by using 1° by 1° bins, and found that only a small fraction (14%) of the DMS variance was captured by a linear model based on SRD or MLD. These authors also pointed out that the previously identified strong relationship between MLD/SRD and DMS “results from the reduction in the total variance in the data due to binning” (Derevianko et al., 2009).

Prognostic models have also been used to obtain climatological DMS distributions. In these models, phytoplankton are  
45 divided into different groups based on their ability to produce DMS. For example, diatoms produce less DMS than coccolithophores and *Phaeocystis* (e.g. Bopp et al., 2003; Vogt et al., 2010; Gypens et al., 2014). Elliott (2009) implicitly incorporated *Phaeocystis* in a model by assuming that DMS yields are simply related to temperature. The work of Wang et al. (2015) explicitly incorporated *Phaeocystis* into the Biogeochemical Elemental Cycling (BEC) model and included DMSP production from each phytoplankton group, along with DMS leakage pathways from algal cells, (grazing, lysis, and exudation).  
50 Despite this level of modeling detail, there are still large discrepancies between the model simulations and in situ measurements [\(Le Clainche et al., 2010; Tesdal et al., 2016\)](#).

The DMS climatologies used in most climate models were obtained by extrapolating observed DMS to the global ocean using objective analysis schemes (Kettle et al., 1999; Lana et al., 2011). In those climatologies, observational data were first binned and averaged into 1° by 1° grid squares, which were then grouped into 57 static biogeographic provinces according to  
55 Longhurst (1998). [Many provinces lacked adequate data to create a reliable climatology \(Fig. A1\). In those situations, they first generated an annual cycle with monthly means for each province. Temporal interpolations were used to fill the monthly gaps](#)

if there were enough data to create a robust annual mean. Otherwise, interpolation from neighboring provinces was used to fill the remaining gaps. Major gaps remain in the observational data base for wintertime in the high latitudes of both hemispheres.

Machine learning is being increasingly used in oceanography and geoscience studies (Bergen et al., 2019). For example, Roshan and DeVries (2017) applied an artificial neural network (ANN) to extrapolate observed dissolved organic carbon (DOC) to the global ocean. Rafter et al. (2019) used an ensemble of neural networks to study oceanic  $\delta^{15}\text{N}$  distribution. ANNs have also been used to study DMS on regional scales (e.g. Humphries et al., 2012). The popularity of machine learning partially stems from one of its inherent advantages: it can detect non-linear relationships that traditional linear regression models are unable to capture. The precursor of DMS, DMSP, is mainly produced by marine algae (e.g. Kiene et al., 2000; Curson et al., 2011), and a small fraction of DMSP is transformed to DMS by marine algae and/or bacteria lyases (Simó, 2001; Stefels et al., 2007; Curson et al., 2011; Moran et al., 2012), and mostly as a result of food web interactions (Kiene et al., 2000; Simó, 2001). As a result, we expect that there exists a functional relationship between parameters controlling the growth of phytoplankton or species distribution. The objective of this paper is to explore possible relationships between DMS and environmental variables, with the goal of creating a monthly-resolved DMS climatology.

The paper is organized as follows. We begin by exploring the relationships between DMS concentration and various environmental parameters taken one at a time using linear regression. We then do a stepwise multilinear regression to create a reference model to which we compare our neural network model results. Lastly, we train an ANN using DMS measurements and environmental parameters. With the trained networks, we extrapolate the sparse measurements globally to obtain gridded fields of monthly DMS distributions and sea-to-air DMS fluxes.

## 2 Materials and Methods

### 2.1 Data sources and cleaning

Surface ocean DMS data were obtained from the Global Surface Seawater DMS database (PMEL) and from the North Atlantic Aerosol and Marine Ecosystems experiment [NAAMES] (Behrenfeld et al., 2019) (Table A1). In total, there are 93,571 valid measurements (PMEL: 86,785 and NAAMES: 6,786) after removing ultra-low ( $<0.1$  nM) and ultra-high ( $>100$  nM) DMS measurements according to Galí et al. (2015). The number of measurements used are substantially more than the 47,313 used by Lana et al. (2011). The Global Surface Seawater DMS database also includes some ancillary in situ data, such as DMSP (4,620), Chl *a* (PMEL: 11,491, NAAMES: 6750), sea surface temperature (SST; PMEL: 81,069, NAAMES: 6,786), and salinity (SSS; PMEL: 77,209, NAAMES: 6,786). In situ SST and SSS were used if available. If not, monthly climatology data from other sources (Table A1) are used to fill the gaps. SeaWiFS Chl-*a* data (Level 3-binned, spatial resolution of 9.2 km) from December 1997 to March 2010 were matched to DMS data according to coordinates and sampling date. We compared PMEL in situ Chl *a* to SeaWiFS Chl *a*, which are well correlated on logarithmic scale ( $R^2 = 0.64$ ) with a slope of 0.67 and an intercept of -0.06, [ $\log(\text{Chl}_{\text{SeaWiFS}}) = 0.67\log(\text{Chl}_{\text{in situ}}) - 0.01$ ], which means that on logarithmic scale SeaWiFS Chl-*a* concentrations are on average  $\sim 30\%$  lower than those of in situ Chl-*a* concentrations. This is possibly because SeaWiFS Chl *a* is calibrated based on HPLC determined Chl *a* (Morel et al., 2007), which on average is  $\sim 40\%$  lower than that determined

90 using Fluorometric method (Sathyendranath et al., 2009). Unfortunately, there is no flag in the database showing how Chl *a* was determined. For consistency, we use only Chl-*a* data retrieved from SeaWiFS in the following multilinear and network models.

SeaWiFS photosynthetically available radiation (PAR) and diffuse attenuation coefficient for downwelling irradiance at 490 nm (Kd490) (both are L3BIN with spatial resolution of 9.3 km) from September 1997 to August 2010 were matched with DMS  
95 according to coordinates and sampling date. Mixed layer depth climatologies were obtained from the MIMOC climatology (Schmidtko et al., 2013). Sea ice cover was from a simulation with the ocean component of the Community Earth System Model (CESM) forced with a repeating thirty year cycle (1980-2009) of NCEP reanalysis datasets (Wang et al., 2019). The output was averaged into a monthly climatology and was used as part of the air-sea gas exchange calculations. Nutrient data (nitrate, phosphate, and silicate) from World Ocean Atlas (WOA2013, Garcia et al. (2013)) were also included in the multilinear  
100 regression and neural network analyses, since they can exert influence on phytoplankton distribution and thus influence DMS production (Wang et al., 2015; Archer et al., 2009). The ancillary data are then matched with DMS data according to sampling location and time of year.

The entire dataset is subjected to another round of quality control following Galí et al. (2015). Specifically, coastal data with salinity lower than 30 and samples with sampling depth greater than 10 m were removed. Additionally, data with extremely  
105 low nutrient concentrations (e.g. DIP < 0.01  $\mu\text{M}$ , DIN < 0.01  $\mu\text{M}$ , SiO < 0.1  $\mu\text{M}$ ) or low Chl-*a* concentrations (Chl *a* < 0.01  $\text{mg}/\text{m}^3$ ) were also removed because a) the low concentrations are below traditional method detection limits and b) they cause the data distributions severely left skewed, which significantly affects the performance of a ANN model.

## 2.2 Linear regressions

Linear regression models are conducted on three sets of data to diagnose the predictive skill of each ancillary variable. As a first  
110 step, we restrict the regression model to the PMEL data sets where both DMS and the predictor variable are simultaneously available. This selection process yields a total of 10,404 pairs for Chl *a* and DMS, 4,061 pairs of total DMSP (DMSPt) and DMS, 69,197 pairs of SST and DMS, and 85,150 pairs of SSS and DMS, respectively. In a second step, we conduct regression models on combined PMEL and NAAMES data. Since almost all NAAMES samples are accompanied by in situ measurements of Chl *a*, SSS, and SST, the data pairs increased to 17,153 pairs for Chl *a* and DMS, 75,983 pairs of SSS and DMS, and 91,936  
115 pairs of SST and DMS, respectively. In a third step, the unmeasured predictors (i.e. MLD, PAR, Nitrate (DIN), Phosphate (DIP), and Silicate ( $\text{SiO}_4^{4-}$ ), SST, SSS, and Chl *a*) are filled in using monthly climatology data from the previously cited sources. DMSPt is not included, because there is no available climatological dataset to fill the missing values.

To reduce the dynamic range, we log-transform the DMS, DMSPt, Chl *a*, MLD, DIP, DIN, SiO, and SST after conversion to absolute temperature to avoid losing data with temperature below or equal to 0 °C. ~~We do not log-transform SST to avoid losing data with temperature below (equal to) zero.~~ The corresponding predictors are then standardized to their z-score,  $Z \equiv (C - \bar{C})/\sigma$ , where  $C$  is predictor's concentration;  $\bar{C}$  is the mean of the variables; and  $\sigma$  is standard deviation of the variables. Matlab's `polyfit` function is applied to each pair to fit a first degree polynomial, i.e. a linear regression.



### 2.3 Multilinear regression

We begin by applying a step-wise multi-linear regression model to the environmental data using Matlab's `stepwiselm` function. In a first test, we consider a total of eight potential DMS predictors: PAR, MLD, Chl *a*, SSS, SST, DIN, DIP, and SiO. In a second test, we combine the above eight potential parameters with sampling location and time parameters (Eq: 1-3). The ANN requires that the predictor fields be available for every DMS data point so we fill missing values in the environmental dataset with climatological data. We eliminate DMS measurements that are under ice cover, leaving us with 82,996 DMS measurements with a complete set of predictors.

The in situ sampling times (months and hours) were converted to periodic functions using sine and cosine functions to address the data continuity issue, such that in a diurnal or seasonal cycle the start (0th hour or January) and the end (24th hour or December) of a cycle share the same properties, but are numerically different. The coordinate space notations have a similar issue in the longitudinal direction. The conversions are conducted according to Gade (2010) and Gregor et al. (2017) as follows:

$$\begin{bmatrix} \text{H1} \\ \text{H2} \end{bmatrix} = \begin{bmatrix} \cos(\text{hour} \frac{2\pi}{24}) \\ \sin(\text{hour} \frac{2\pi}{24}) \end{bmatrix}, \quad (1)$$

$$\begin{bmatrix} \text{M1} \\ \text{M2} \end{bmatrix} = \begin{bmatrix} \cos(\text{month} \frac{2\pi}{12}) \\ \sin(\text{month} \frac{2\pi}{12}) \end{bmatrix}, \quad (2)$$

$$\begin{bmatrix} \text{L1} \\ \text{L2} \\ \text{L3} \end{bmatrix} = \begin{bmatrix} \sin(\text{lat} \frac{\pi}{180}) \\ \sin(\text{lon} \frac{\pi}{180}) \cos(\text{lat} \frac{\pi}{180}) \\ -\cos(\text{lon} \frac{\pi}{180}) \cos(\text{lat} \frac{\pi}{180}) \end{bmatrix}. \quad (3)$$

Bayesian Information Criterion (BIC) of 0.01 is used as a criterion for accepting or rejecting a predictor, which means that predictors are removed if they induce a BIC increase of more than 0.01.

### 2.4 Artificial Neural Network (ANN)

To assess the possibility that a non-linear model might provide better prediction, we train artificial neural networks (ANNs) using the `Keras` deep learning toolbox in Python. DMS concentration along with the eight environmental predictors (PAR, MLD, Chl *a*, SSS, SST, DIN, DIP, and SiO) are log-transformed. The predictors' dynamic ranges are then constrained to the [-1,1] interval using a minmax normalization, i.e.  $C_{norm} \equiv (C - C_{min}) / (C_{max} - C_{min})$ , where  $C_{min}$  and  $C_{max}$  are the minimum and maximum values in the data  $C$ , respectively.

The dataset is then separated into three sets: training, internal testing, and external validating sets. Data from each of the fourteen one-degree-latitude bands (64°N–65°N, 54°N–55°N, 44°N–45°N, 34°N–35°N, 24°N–25°N, 14°N–15°N, 4°N–5°N, 4°N–5°S, 14°S–15°S, 24°S–25°S, 34°S–35°S, 44°S–45°S, 54°S–55°S, 64°S–65°S,) are left out for inter-

nal testing (9,084 points). Data from each of the fifteen one-degree-latitude bands (69°N–70°N, 59°N–60°N, 49°N–50°N, 39°N–40°N, 29°N–30°N, 19°N–20°N, 9°N–10°N, 1°N–0°S, 9°S–10°S, 19°S–20°S, 29°S–30°S, 39°S–40°S, 49°S–50°S, 59°S–60°S, 69°S–70°S) are left out for external validation (10,870 points). The remaining data (63,042 points) are used to train the neural network. The data was split into sets manually rather than automatically. The online DMS data are organized  
155 by contributor ID, and automatic splitting draws a continuous portion from the data. The data portion may come from a specific contributor who collected data from a specific region and it may therefore not be representative. This would result in an over-trained or a under-trained model. To make the selected data more representative, a common practice is to shuffle the data, and then randomly draw a fraction from the shuffled data. For DMS, data collected from the same cruise are highly intercorrelated, so that shuffling and randomly splitting "leaks" information to the model and causes overfitting. We manually adjust  
160 the hyper-parameters (dropout ratio, hidden layers, number of nodes etc.) using the data that has been manually-divided into training, internal testing, and external validation subsets. After obtaining a satisfactory combination of those hyper-parameters (as discussed below), we fix them and fine tune the network using all available data.

The network has one input layer with input nodes corresponding to the number of predictors, two dense hidden layers with 128 nodes each, and one output layer with one node corresponding to the predicted logarithm of DMS concentration. To avoid  
165 overfitting, we add two dropout layers with a dropout ratio of 25% after each hidden layer. We also apply a L2 kernel regularizer for each hidden layer with the regulation parameter value set to 0.001. When the network is trained, the mean squared error of the internal validation data is monitored, and the training is stopped when there is no error reduction in 10 epochs. An epoch consists of one forward pass and one backward pass of all the training examples. Only the best model with the lowest validation mean squared error is saved. We tested different network setups - the current setting achieves goodness of fit, but  
170 avoids overfitting.

### 2.4.1 Parameter selections

The 15 predictors (8 environmental predictors and 7 time and coordination signatures) were tested separately. In the first set of tests, we use only time and location parameters. In the second set of tests, we run a series models that examine every possible  
175 combination of the eight environmental parameters (a total of 255 combinations) to time and location parameters. The models are then ranked according to the root mean square error of the validation data.

### 2.4.2 Monthly climatology

To obtain monthly DMS climatologies, we interpolate the corresponding predictor variables (PAR, MLD, Chl *a*, SSS, SST, DIN, DIP, and SiO) onto a 1° by 1° grid. Coordinates and target months are transformed accordingly. We then apply the top  
180 10 (Section: 2.4.1) trained networks to obtain DMS monthly concentrations. Monthly results from 10 models are then used to produce the final monthly climatology and to analyze uncertainties.

## 2.5 Sea-to-air flux

Air-sea gas transfer is estimated using the following bulk formula,

$$185 \quad F = K_w(C_w - C_a/H), \quad (4)$$

where  $F$  is sea-to-air gas exchange flux,  $C_a$  and  $C_w$  are bulk air and bulk water gas concentrations, and  $K_w$  (cm/hr) is the overall gas transfer velocity, expressed in water side units (Liss, 1974).  $K_w$  reflects the combined resistance to gas transfer on both sides of the interface, as follows:

$$1/K_w = 1/k_w + 1/(Hk_a), \quad (5)$$

190 where  $H$  is the dimensionless (gas/liquid) Henry's law constant and  $k_a$  and  $k_w$  are gas transfer velocities in air and seawater. DMS in the surface ocean is strongly supersaturated with respect to that in the overlying atmosphere ( $C_w \gg C_a$ ), which simplifies the flux Eq. 4 to

$$F = K_w C_w, \quad (6)$$

For this study we used two parameterizations for  $K_w$ . The Goddijn-Murphy et al. (2012) parameterization (hereafter GM12) is based on regressions between satellite based wind-speed observations with shipboard in situ measurements of DMS gas transfer velocities using eddy covariance. The GM12 parameterization for  $K_w$  normalized to a  $S_c$  number of 660 is

$$K_{w,660} = 2.1U_{10} - 2.8, \quad (7)$$

where  $U_{10}$  is wind speed (m/s) at 10 m above sea surface. We also utilized the Nightingale et al. (2000) (hereafter N00), which is based on shipboard  $^3\text{He}/\text{SF}_6$  dual tracer experiments. Their parameterization for water side only DMS gas transfer velocity at a Schmidt number of 660 ( $\kappa_{w,660}$ ) is calculated as follows,

$$k_{w,660} = (0.222U_{10}^2 + 0.333U_{10})(S_{c_{DMS}}/600)^{-0.5}, \quad (8)$$

where  $S_{c_{DMS}}$  is calculated as a function of temperature after Saltzman et al. (1993). A total transfer velocity is obtained from N00 as follows,

$$K_{w,660} = k_{w,660}(1 - \gamma_a), \quad (9)$$

205 where  $\gamma_a$  is atmospheric gradient fraction given by  $\gamma_a = 1/(1 + k_a/\alpha k_{w,660})$  (McGillis et al., 2000). Air side DMS transfer velocity is given as  $k_a = 659U_{10}(M_{DMS}/M_{H_2O})^{-0.5}$ , where  $M_{DMS}$  and  $M_{H_2O}$  are the molecular weights of DMS and water, respectively (McGillis et al., 2000).

DMS fluxes were calculated using surface ocean DMS concentrations from the ANN results and a satellite-based wind speed climatology (Table A1 and Fig. A2). [Because the N00 parameterization was calibrated using in situ wind speeds and has a nonlinear quadratic dependence on wind speed, the use of monthly mean wind speeds will introduce errors. To reconcile the](#)

210

differences between in situ wind speed and monthly mean wind speed, a correction is applied according to Simó and Dachs (2002) by assuming that instantaneous wind speeds follow a Rayleigh distribution. Eq. 8 thus becomes  $k_{w,660} = [0.222\eta^2\Gamma(1 + 2/\xi) + 0.333\eta\Gamma(s)](Sc_{DMS}/600)^{-0.5}$ , where  $\eta^2 = 4U_{10}^2/\pi$ ;  $s = (1 + 1/\xi)$ , and  $\xi = 2$  for Rayleigh distribution (Livingstone and Imboden, 1993). Ice fraction data are from the CESM simulation monthly climatology. DMS fluxes from ice-covered regions are set to zero, although DMS concentration in or below sea ice is not necessarily zero.

### 3 Results and discussion

#### 3.1 Linear regressions

The linear regression coefficients and  $R^2$  values are summarized in Table 1. For the test using in situ measurements, DMS and DMSPt show the strongest positive correlation with a  $R^2$  value of 0.41 ( $n = 4061$ ). Galí et al. (2018) reported a slightly higher  $R^2$  value (0.42) with less data points ( $n = 3637$ ). It is not surprising to find the strong relationship between total DMSP (DMSPt) and DMS, since DMS derives from the enzymatic cleavage of DMSP (Stefels, 2000; Stefels et al., 2007). However, it is difficult to infer global scale climatological DMS distributions from total DMSP measurements, because there are approximately 10-fold fewer measurements of total DMSP compared to DMS. Since DMSP is directly produced by phytoplankton and does not undergo sea-to-air gas exchange, it is relatively easy to parameterize in a biogeochemical model (Galí et al., 2015). The strong relationship between DMS and DMSP point toward a potential way to model marine seawater DMS. McParland and Levine (2019) developed a mechanistic model that related intracellular DMSP concentration to environmental stress, and coupled the model with MIT ecosystem model (DARWIN) to estimate global ocean DMSP distribution. Galí et al. (2015) first applied a remote sensing algorithm to obtain a DMSP climatology, from which they predict DMS climatology through an empirical relationship with PAR (Galí et al., 2018).

The second strongest predictor is in situ Chl  $a$  ( $R^2 = 0.21$ ,  $n = 10,404$ ), which is slightly higher than that by Galí et al. (2018) who reported a  $R^2$  value of 0.20 ( $n = 8,141$ ). The positive correlation between Chl  $a$  and DMS is possibly due to the fact that the precursor of DMS, namely DMSP, is biogenic. However, when we test the relationship on satellite-based climatological Chl  $a$ , it becomes weaker (PMEL,  $R^2 = 0.09$ ,  $n = 81,767$ ; PMEL+NAAMES  $R^2 = 0.09$ ,  $n = 88,516$ ). The weaker relationship can be caused by several reasons: 1) Greater variance in the larger dataset (81,767 vs 10,404); 2) mismatch between satellite derived Chl- $a$  concentrations and analytical Chl- $a$  concentrations; 3) the in situ Chl- $a$  samples in PMEL database were collected mainly in highly productive regions (Galí et al., 2018), whereas the relationship between Chl- $a$  and DMS may negatively correlated in oligotrophic oceans over the seasonal cycle (Galí and Simó, 2015).

When tested against climatological data with gaps filled-in, PAR has the strongest correlation with DMS (PMEL:  $R^2 = 0.07$ ,  $n = 82,137$ ; PMEL+NAAMES:  $R^2 = 0.09$ ,  $n = 88,923$ ) with a positive correlation slope. Climatological MLD is the second strongest predictor (PMEL:  $R^2 = 0.06$ ,  $n = 81,646$ ; PMEL+NAAMES:  $R^2 = 0.07$ ,  $n = 88,214$ ) of raw DMS data, with a slope of -0.25 for PMEL and -0.26 for PMEL and NAAMES combined data.

### 3.2 Multilinear regression

A multilinear regression model that uses a combination of predictors or product of predictors has higher predictive ability than a linear regression model. For example, a multilinear regression model using eight environmental parameters has a  $R^2$  value of 0.28, which is higher than that of any of the linear models. By adding time and location parameters, the  $R^2$  value increases to 0.39 ( $n = 82,996$ , Fig. 1.) The results emphasize the importance of including time and location information in the model. Sampling time and location are useful predictors, especially when the output has strong seasonality such as DMS. Given a location and sampling time, the model roughly predicts the level of DMS concentrations (e.g. high latitude DMS concentrations are higher in summer than in winter). However, it is apparent that the multilinear regression model significantly underestimates high DMS concentrations. The generally low correlation coefficient hinders the possibility of reliably extrapolating the model to the global ocean.

### 3.3 ANN

Fig. 1b displays the ~~tracer-tracer~~ correlation between DMS observations and ANN predictions. Compared to simple linear and multilinear regression models, ANN captures much more of the observed DMS variance ( $R^2 = 0.66$ ,  $n = 82,996$ ). Compared to previous extrapolations (Kettle et al., 1999; Lana et al., 2011), the ability of the ANN to build a nonlinear relationship between DMS and environmental predictors allows it to capture ~~more~~ much of the variance. It also incorporates diurnal and seasonal signals present in the data. As a result, the extrapolation obtained from the ANN considers the relationship with geographical neighbors and also with temporal relationships.

From traditional linear or multilinear models, one can easily determine which parameter is a strong predictor and how a predictor influences the state variable (e.g. the correlation between DMSP and DMS). An ANN model is much more complex, it adjusts weights of each node that connect inputs and outputs. The relationship between inputs and outputs is therefore much more subtle and is why ANN models are generally referred to as a "Black Box". In this study, we design experiments that help open this "Black Box" and reveal parameters that drive surface ocean DMS distributions.

As shown in Fig. 2, without using any environmental parameters, sampling location and date alone can explain 44% of the validation data variance (RMSE = 0.65 on natural logarithm scale). Given the strong correlation between solar radiation and DMS concentration reported by Vallina and Simó (2007), one would expect that adding sampling time would improve the model performance. However, it increases RMSE slightly (Fig. 2a). Galí et al. (2013c) studied diel cycle at the Mediterranean Sea and Sargasso Sea. Among their four experiments (three in the Mediterranean Sea and one in the Sargasso Sea) regular diel variation was observed at only one experiment in the Mediterranean Sea at summer season, with highest DMS values observed at midnight and lowest values at midday. In all the other experiments, diel variations for both DMS and DMSPt pools were small. Gross community DMS production during the daytime was two to three times higher than that in the nighttime, but the high DMS production was compensated by greater photochemical and microbial consumption (Galí et al., 2013c). The balance between DMS production and consumption appears to dampens DMS diel variation. This may explain why adding time parameters does not improve the ANN model's predictive ability.

275 Adding environmental parameters can further improve the model performance, however, different parameter combinations show different predictive abilities. Among the top 10 models ranked according to RMSE of validation data (PAR + MLD + SAL + SST, MLD + SST, SAL + SST + DIP + Chl *a*, MLD + SST + DIP, PAR + MLD + SAL + SST + SiO + DIP, PAR + MLD + SST + SiO, MLD + SAL + DIP, PAR + MLD + SST + Chl *a*, PAR + MLD + SST + SiO + DIP, SAL + SST + SiO + Chl *a*), 9 models have SST, 8 models have MLD, 5 models have PAR, SSS, and DIP, 4 models have SiO, and 3 models have  
280 Chl *a* as a predictor, and none of the models have DIN as a predictor.

Based on the appearance frequency, SST (9 times over top 10 models) should be a strong predictor. Physiologically, DMSP is an important cryoprotectant that helps algae deal with cold temperature especially in high latitude oceans (Thomas and Dieckmann, 2002). However, the linear regression models show that there is almost no correlation between SST and DMS. Also, SST alone with date and location parameters have very low prediction ability (ranked 244 over 255 models). When  
285 combined with other parameters, SST helps to improve the model performance. For example, the combination of SST and MLD ranks 2nd place among all models. Therefore, SST may work synergistically with other parameters to increase the prediction ability.

MLD is another important predictor. High DMS concentrations in the open ocean have been detected when the water column is most stratified (Simó and Pedrós-Alió, 1999). The authors proposed that a stratified (high light) environment nourishes  
290 strong DMSP producers, or that phytoplankton cellular DMSP quota increases in such an environment. High conversion rates from DMSP to DMS in stratified waters is another reason for high DMS concentrations when MLD is shallow. Meanwhile, the biological DMS consumption rate decreases in oligotrophic oceans (Galí and Simó, 2015). A dilution model was also proposed to explain the anti-correlation between DMS concentration and MLD (Aranami and Tsunogai, 2004). The authors proposed that mixed layer deepening entrains water with little or no DMS into surface waters and dilutes surface DMS concentrations,  
295 but recent studies have shown that DMS loss rate via vertical mixing is orders of magnitude lower than production/consumption rates (e.g. Galí et al., 2013c; Royer et al., 2016).

Physiologically, the correlation between PAR and DMS can be explained by two reasons. First, high radiation negatively influences the bacterial population/activity, which decreases DMS consumption (Galí et al., 2013a, b, c; Royer et al., 2016). Second, high radiation promotes DMS production by inducing oxidative stress within algal cells (Toole et al., 2006; Sunda  
300 et al., 2002; Royer et al., 2016). Strong correlation between monthly binned and averaged solar radiation dose (SRD) and DMS concentration has been reported ( $R^2 = 0.94$ ) at the Blanes Bay Microbial Observatory located in the coast of northwest Mediterranean (Vallina and Simó, 2007). Galí et al. (2018) also combined PAR with DMSPt distribution to predict DMS climatologies, indicating that PAR is an important parameter controlling the conversion of DMSPt to DMS.

The appearance of SSS in the models may be due to osmoregulation function of DMSP in cells, which helps algae survive  
305 in high salinity waters (Thomas and Dieckmann, 2002; Webb et al., 2019). The appearance of DIP and SiO in the model is probably related to nutrient stress, which can increase DMSP production by low DMSP producers (e.g. diatoms) (McParland and Levine, 2019). In their recent paper, McParland and Levine (2019) showed that intracellular DMSP concentrations in low DMSP producers can increase by  $\sim 16$  times in nutrient stress situations, while in high DMSP producers (e.g. coccolithophores)

the change is small (1.5-fold). However, they also pointed out that the intracellular changes of DMSP due to nutrient stress has  
310 a minor effect on large scale DMSP distribution, and that community composition plays the most important role.

Previous studies of the relationship between DMS and Chl *a* have produced contradictory results. Our linear regression  
models show a higher correlation coefficient using the in situ data than when using the satellite Chl-*a* data. Strong correlation  
relationships have been reported in basin scale studies (e.g. Yang et al., 1999). On the other hand, there are numerous studies  
that observed no correlation between DMS and Chl *a* (e.g. Dacey et al., 1998; Kettle et al., 1999; Toole and Siegel, 2004). The  
315 inconsistent relationships indicate the complexity of the biogeochemical reduced sulfur cycle. As suggested by Simó (2001),  
not only can phytoplankton biomass, taxonomy, and activity influence DMS production, but so does food-web structure and  
dynamics. The inconsistent relationship may also explain the low ranking of Chl *a* in the models.

### 3.4 Binned data versus raw data

Simó and Dachs (2002) obtained high  $R^2$  values between DMS concentration and the ratio of Chl *a* to MLD (Chl/MLD) when  
320 Chl/MLD is greater than or equal to 0.02, and between DMS concentration and ln(MLD) when Chl/MLD is less than 0.02.  
We tried exactly the same model on raw PMEL data with in situ Chl-*a* measurements and climatological MLD, and found that  
both correlations between DMS and Chl/MLD ( $n = 4,921$ ,  $R^2 \approx 0.1$ ) and between DMS and ln(MLD) ( $n = 5,978$ ,  $R^2 \approx 0$ )  
) are statistically insignificant. To reduce interannual variability, we binned in situ Chl *a* and DMS into monthly  $1^\circ \times 1^\circ$  grid,  
and retested the above model on the binned data, and found that the correlations are still statistically insignificant.

325 Vallina and Simó (2007) reported an  $R^2$  of 0.95 ( $n=14$ ) between DMS concentration and SRD. We applied the same linear  
regressions on both raw data and monthly  $1^\circ \times 1^\circ$  data, and found no significant correlations between DMS and SRD as  
calculated according to Vallina and Simó (2007):

$$\text{SRD} = \text{SI} \cdot \frac{1}{\text{Kd}_{490} \cdot \text{MLD}} (1 - e^{-\text{Kd}_{490} \cdot \text{MLD}}), \quad (10)$$

where SI is shortwave irradiance ( $\text{W m}^{-2}$ ), which is converted from PAR according to Galí and Simó (2015).

330 Compared to Simó and Dachs (2002) and Vallina and Simó (2007), we used significantly more data points. For example,  
in this study, there is a total of 10,899 DMS measurements accompanied with simultaneous Chl *a* measurements versus 2,385  
data points used in Simó and Dachs (2002), and 83,152 (DMS, MLD) pairs in this study versus 26,400 in Vallina and Simó  
(2007). Another noticeable difference between the current study and previous analyses is that both Simó and Dachs (2002) and  
Vallina and Simó (2007) binned the data into large longitude and latitude grids. By doing so, the raw data variance is greatly  
335 reduced.

Binning data will necessarily result in loss of information. A lot of information is associated with sampling location and  
date as shown in Fig. 2a. By binning the data into monthly  $1^\circ \times 1^\circ$  grid, the number of data points decreases from 82,996 to  
only 9,018; sampling date feature (365) will be average to 12 months, and coordination combinations will be averaged from  
87,332x87,332 to  $180^\circ \times 360^\circ$ , which represents a substantial loss of information. For ANN models, using less data points can  
340 lead to overfitting (See Fig. 2b).

### 3.5 DMS distributions

Northern and Southern hemisphere monthly mean DMS concentrations are plotted along with results from previous studies (Simó and Dachs, 2002; Vallina and Simó, 2007; Lana et al., 2011; Galí et al., 2018) (Fig. 3a). Overall, all models show similar seasonal patterns with highest concentrations in summer and lowest concentrations in winter. Our predictions are highly  
345 consistent with the products derived from satellite data reported by Galí et al. (2018), who used an optimized relationship between DMS, DMSPt, and PAR to obtain DMS climatology from satellite retrieved PAR and DMSPt fields (Galí et al., 2015). In the northern hemisphere, the algorithms by Simó and Dachs (2002) (SD02 hereafter) and by Vallina and Simó (2007) (VS07 hereafter) generate higher and flatter seasonality. From zonal average plots (Fig.4), it is clear that the elevated monthly means from SD02 are caused by high concentrations in high latitude oceans, whereas, high monthly means of VS07 are caused by  
350 high DMS concentrations in low and middle latitude. High DMS concentration in high latitude summer (SD02) is driven by shoaling of MLD caused by freshwater runoff (Galí et al., 2018), while high DMS concentrations at low/middle latitude (VS07) are driven by strong solar radiation dose, which is a joint effect of shallow MLD and strong irradiance.

L11 stands out in the S. hemisphere monthly mean plot (Fig. 3b), with the highest mean concentrations in January and December, when DMS concentrations are  $\sim 2$  times higher than other model predictions. Galí et al. (2018) identified five short-  
355 comings associated with the direct interpolation method employed by Lana et al. (2011). All shortcomings concern the nature of in situ DMS data, including right-skewed distribution, lack of spatial and temporal coverage, lack of duplicate measurements, and sampling bias towards DMS-productive conditions. Because of the sparsity and skewed distribution, the interpolation/extrapolation method broadcasts small scale features to large scales (Tesdal et al., 2016). This is especially true for the month of January and December when the elevated L11 monthly means were mainly driven by a small amount of extremely  
360 high DMS measurements ( $>40$  nM) near the Antarctic continent. On the other hand, empirical models including the ANN model used in this study rely on environmental parameter climatologies to obtain the DMS climatology. Extreme conditions are smoothed out in climatological data, e.g. in the DMS database the maximum in situ Chl-*a* concentration is  $> 800$  mg/m<sup>3</sup>, whereas it is  $\sim 50$  mg/m<sup>3</sup> in the SeaWiFS climatology. When climatological data are used to generate DMS distribution, a smaller variance than in situ data is expected.

365 Fig. 5 displays monthly DMS concentration distributions predicted by the ANN. Generally, DMS concentrations in polar regions show strong seasonality. The highest DMS concentrations are in summer when light and temperature are ideal for primary production. For example, in austral summer, the Southern Ocean circumpolar regions display the highest DMS concentration ( $>10$  nM). DMS concentration in the Scotia Sea and Ross Sea display the highest DMS concentration, which gradually decreases and falls below 0.5 nM in the following months when primary production is limited by light or low temperature. In  
370 boreal summer, DMS concentration in the Bering Sea and Greenland Sea can exceed 20 nM.

The summertime high DMS concentration at high latitudes is believed to be linked to the release of ice algae that are prolific DMSP producers (Stefels et al., 2012; Webb et al., 2019). As an important cryoprotectant and osmolyte, DMSP helps ice algae to cope with the low temperature and high salinity conditions (Thomas and Dieckmann, 2002). High DMS concentrations at high latitudes have also been observed to accompany blooms of coccolithophores and *Phaeocystis*, which are strong DMSP



375 producers (Neukermans et al., 2018; Wang et al., 2015). The shoaling of mixed layer depth in summer provides favorable conditions, i.e. stable and warm, with adequate irradiation for coccolithophores and *Phaeocystis* growth (Galí et al., 2019).

Another interesting region is the Pacific equatorial upwelling region. Large-scale upwelling brings nutrient-rich waters to the surface, which nourish highly productive phytoplankton communities. Overall, the seasonality in the equatorial Pacific is weaker than that in polar regions, but there is still a clear seasonal pattern. In the period from December to April, the  
380 tongue with higher DMS concentration ( $\sim 3$  nM) extends to the west Pacific Ocean reaching the east coast of Australia and the Philippine Sea. The tongue gradually retreats eastward in the following months. From September to November, the tongue is constrained to the eastern Pacific and DMS concentration falls to its lowest values ( $< 2.0$  nM). High DMS concentrations in the west Pacific ocean from November to February are also predicted by Lana et al. (2011).

The subtropical gyres show consistently low DMS concentrations and weak seasonal cycles throughout the year. In the south-  
385 ern hemisphere gyres, DMS concentrations are highest during austral summer, when the ocean is strongly stratified and local primary production is low. There are hot spots where DMS concentration exceeds 3 nM in December and February. DMS concentrations are generally low ( $\leq 1$  nM) during austral spring and winter seasons. In the period from April to September, DMS concentrations in the S. Atlantic gyre fall below ~~0.1 nM~~ 0.6 nM. In the northern hemisphere gyres, DMS concentrations are high during the boreal summer season. Fig. 6 compares monthly mean Chl-*a* concentrations to DMS concentrations in N. and  
390 S. hemisphere gyres. The concentrations are normalized to the range of 0 to 1. It is clear that Chl *a* and DMS are anti-correlated, DMS concentration peaks at summer season when Ch-*a* concentration is generally low. This phenomenon is previously termed as “summer DMS paradox” (Simó and Pedrós-Alió, 1999). This pattern is more apparent in the S. hemisphere gyres, because the terrestrial influence is smaller in the S. hemisphere than in the N. hemisphere.

### 3.6 Sea-to-air flux

395 In this study, we computed monthly sea-to-air DMS fluxes using both the GM12 and N00 gas transfer velocity parameterizations (Fig. 7 and Fig. 8). These yield global DMS annual fluxes of  $15.89 \pm 0.34$  Tg S yr<sup>-1</sup> [GM12] and  $20.12 \pm 0.43$  Tg S yr<sup>-1</sup> [N00], respectively. The uncertainties ( $\pm 1\sigma$ ) are calculated according to DMS distributions from the top 10 ANN models based on different parameter combinations. We also calculated sea-to-air DMS fluxes using the N00 parameterization and previous  
400 DMS climatologies from Lana et al. (2011) [L11], Simó and Dachs (2002) [SD02], Vallina and Simó (2007) [VS07], and four from Galí et al. (2018)[Gali18]. Among those climatologies, VS07 produces the highest annual DMS flux ( $31.59$  Tg S yr<sup>-1</sup>), the ensemble of Galí et al. (2018) climatologies produce the lowest flux ( $18.18 \pm 0.52$  Tg S yr<sup>-1</sup>) (Table 2). Generally, our fluxes are consistent with previous results when the same flux parameterization, wind speed field, sea surface temperature, and ice coverage are used. The sea-to-air flux based on the GM12 parameterization is  $\sim 24\%$  lower than that based on N00.

Geographically, in the high-latitude northern hemisphere, sea-to-air DMS fluxes are low in boreal winter, even though wind  
405 speeds are high. The DMS flux tends to increase in the proceeding months and reaches a maximum in boreal summer, despite the lower wind speeds (Fig. A2). The inverse relationship between wind speed and DMS flux indicates that the high DMS flux is mainly driven by high seawater DMS concentrations. Large sea-to-air DMS fluxes at high latitudes in austral summer are driven jointly by high DMS concentrations and high wind speeds (Fig. 7 and Fig. A2). The eastern tropical Pacific Ocean

displays a year-round intermediate sea-to-air DMS flux. This is mainly driven by the high DMS concentration in this region,  
410 since the wind speeds here are generally low (Fig. 7 and Fig. A2).

Fig. 8 displays integrated monthly global DMS fluxes for both hemispheres and for the global ocean based on GM12 velocity  
parameterizations. Globally, DMS fluxes are highest in the winter months (Dec., Jan., and Feb.) and March, which is mainly  
driven by high DMS flux in the Southern Hemisphere. There is another peak in the months of July and August because of  
northern hemisphere flux peaks. An interesting feature is that the Northern hemisphere peak is close to Southern hemisphere  
415 though, and does not reach the peak level in the Southern hemisphere. This is mainly because of the larger surface area in the  
Southern hemisphere. High DMS fluxes in the southern hemisphere have profound impact to the Earth's climate because there  
are less terrestrial and anthropogenic aerosol inputs compared to the northern hemisphere.

#### 4 Conclusions

The artificial neural network (ANN) used in this study has some advantages compared to the prior methods used to develop  
420 DMS climatologies. Most importantly, the ANN utilizes available measurements to fill regions without DMS observations,  
using non-linear relationships trained in more data rich regions/seasons. By contrast, objective interpolation methods are spa-  
tial/temporal averages of sparse data with ~~no~~ weak underlying basis in environmental variability. As a result, the ANN approach  
captures significantly more of the raw data variance than simple linear/multilinear models. Simple models achieve comparable  
fits only after heavily binning the DMS observations (e.g. Simó and Dachs, 2002; Galí et al., 2015; Vallina and Simó, 2007;  
425 Galí et al., 2018). The ANN is computationally more expensive than the linear/multilinear models, but considerably less expen-  
sive than prognostic biogeochemical models (e.g. Vogt et al., 2010; Wang and Moore, 2011; Wang et al., 2015). The principle  
weakness of the ANN approach is that it does not easily provide scientific insight into the relationships between the param-  
eters. Some insight could be gained by running sensitivity tests in which the response to perturbation of a single parameter is  
diagnosed.

430 The ANN approach is a useful tool for developing trace gas climatologies. It may also be useful as a means of assessing the  
sensitivity of DMS to past/future changes in climate by coupling the ANN to prognostic biogeochemical models. Caution is  
warranted in the interpretation of such efforts because there is as yet no basis for assessing whether the relationships obtained  
by training on contemporary measurements apply to the past or will hold in the future. Such relationships could be investigated  
using paleoceanographic and ice core data (Osman et al., 2019).

435 The annual sea-to-air DMS flux calculated in this study is slightly ( $\sim 23\%$ ) lower than the objective interpolation method  
of Lana et al. (2011) using the same sea-to-air gas exchange models. DMS concentrations from this study are similar to Lana  
et al. (2011) where measurements are abundant, so we infer that the difference is likely caused by positive bias in the objective  
interpolation method for data-sparse regions/seasons.

*Code availability.* Code for ANN model is available at: <https://github.com/weileiw/ANN-DMS-code>

440 *Data availability.* The data for DMS concentrations and sea-to-air flux are available at DOI: 10.5281/zenodo.3631875.

*Author contributions.* W.L.W and G.S. initiated the study and drafted the manuscript. W.L.W. built the model with inputs from F.P., E.S.S., and J.K.M.. E.S.S and T.G.B provided new N. Atlantic DMS measurement data. All authors contributed to review the manuscript, and to interpret the data presented.

*Competing interests.* The authors declare that they have no competing financial interests.

445 *Acknowledgements.* We thank the observational DMS community for making their measurements publicly available. J.K.M., F.P., and W.L.W. are supported by DOE Earth System Modeling program (DE-SC0016539). G.S is supported by the Natural Key Research and Development Program of China (2017YFC1404403). E.S.S. and T.G.B. are supported by the NASA North Atlantic Aerosols and Marine Ecosystems Study (NAAMES), which was funded through the NASA Earth Venture Suborbital program. (NNX#15AF31G). The sources of ancillary data are listed in Table A1.

## 450 **References**

- Andreae, M. and Rosenfeld, D.: Aerosol–cloud–precipitation interactions. Part 1. The nature and sources of cloud-active aerosols, *Earth-Sci Rev*, 89, 13–41, 2008.
- Andreae, M. O. and Barnard, W. R.: The marine chemistry of dimethylsulfide, *Mar. Chem.*, 14, 267–279, [https://doi.org/10.1016/0304-4203\(84\)90047-1](https://doi.org/10.1016/0304-4203(84)90047-1), 1984.
- 455 Aranami, K. and Tsunogai, S.: Seasonal and regional comparison of oceanic and atmospheric dimethylsulfide in the northern North Pacific: Dilution effects on its concentration during winter, *Journal of Geophysical Research: Atmospheres*, 109, 2004.
- Archer, S. D., Cummings, D. G., Llewellyn, C. A., and Fishwick, J. R.: Phytoplankton taxa, irradiance and nutrient availability determine the seasonal cycle of DMSP in temperate shelf seas, *Mar Ecol Prog Ser*, 394, 111–124, 2009.
- Behrenfeld, M. J., Moore, R. H., Hostetler, C. A., Graff, J., Gaube, P., Russell, L. M., Chen, G., Doney, S. C., Giovannoni, S., Liu, H., et al.:  
460 The North Atlantic Aerosol and Marine Ecosystem Study (NAAMES): Science Motive and Mission Overview, *Front Mar Sci*, 6, 2019.
- Bergen, K. J., Johnson, P. A., De Hoop, M. V., and Beroza, G. C.: Machine learning for data-driven discovery in solid Earth geoscience, *Science*, 363, <https://doi.org/10.1126/science.aau0323>, 2019.
- Bopp, L., Aumont, O., Belviso, S., and Monfray, P.: Potential impact of climate change on marine dimethyl sulfide emissions, *Tellus, Series B: Chemical and Physical Meteorology*, 55, 11–22, <https://doi.org/10.1034/j.1600-0889.2003.042.x>, 2003.
- 465 Curson, A. R., Todd, J. D., Sullivan, M. J., and Johnston, A. W.: Catabolism of dimethylsulphoniopropionate: microorganisms, enzymes and genes, *Nature Reviews Microbiology*, 9, 849–859, 2011.
- Dacey, J. W., Howse, F. A., Michaels, A. F., and Wakeham, S. G.: Temporal variability of dimethylsulfide and dimethylsulfoniopropionate in the Sargasso Sea, *Deep Sea Research Part I: Oceanographic Research Papers*, 45, 2085–2104, 1998.
- Derevianko, G. J., Deutsch, C., and Hall, A.: On the relationship between ocean DMS and solar radiation, *Geophys Res Lett*, 36, 2–5,  
470 <https://doi.org/10.1029/2009GL039412>, 2009.
- Elliott, S.: Dependence of DMS global sea-air flux distribution on transfer velocity and concentration field type, *J. Geophys. Res.*, 114, G02 001, <https://doi.org/10.1029/2008JG000710>, 2009.
- Frouin, R., McPherson, J., Ueyoshi, K., and Franz, B. A.: A time series of photosynthetically available radiation at the ocean surface from SeaWiFS and MODIS data, in: *Remote Sensing of the Marine Environment II*, vol. 8525, p. 852519, International Society for Optics and  
475 Photonics, 2012.
- Gade, K.: A Non-singular Horizontal Position Representation, *Journal of Navigation*, 63, 395–417, <https://academic.microsoft.com/paper/2141730410>, 2010.
- Galí, M. and Simó, R.: A meta-analysis of oceanic DMS and DMSP cycling processes: Disentangling the summer paradox, *Global Biogeochemical Cycles*, 29, 496–515, 2015.
- 480 Galí, M., Ruiz-González, C., Lefort, T., Gasol, J. M., Cardelús, C., Romera-Castillo, C., and Simó, R.: Spectral irradiance dependence of sunlight effects on plankton dimethylsulfide production, *Limnology and oceanography*, 58, 489–504, 2013a.
- Galí, M., Simó, R., Pérez, G., Ruiz Gonzalez, C., Sarmiento, H., Royer, S., Fuentes Lema, A., and Gasol, J. M.: Differential response of planktonic primary, bacterial, and dimethylsulfide production rates to static vs. dynamic light exposure in upper mixed-layer summer sea waters, 2013b.
- 485 Galí, M., Simó, R., Vila-Costa, M., Ruiz-González, C., Gasol, J. M., and Matrai, P.: Diel patterns of oceanic dimethylsulfide (DMS) cycling: Microbial and physical drivers, *Global Biogeochemical Cycles*, 27, 620–636, 2013c.

- Galí, M., Devred, E., Levasseur, M., Royer, S.-J., and Babin, M.: A remote sensing algorithm for planktonic dimethylsulfoniopropionate (DMSP) and an analysis of global patterns, *REMOTE SENS ENVIRON*, 171, 171–184, 2015.
- Galí, M., Levasseur, M., Devred, E., Simó, R., and Babin, M.: Sea-surface dimethylsulfide (DMS) concentration from satellite data at global and regional scales, *Biogeosciences*, 15, 3497–3519, <https://doi.org/10.5194/bg-15-3497-2018>, 2018.
- Galí, M., Devred, E., Babin, M., and Levasseur, M.: Decadal increase in Arctic dimethylsulfide emission, *Proceedings of the National Academy of Sciences*, 116, 19311–19317, 2019.
- Garcia, H. E., Locarnini, R. A., Boyer, T. P., Antonov, J. I., Baranova, O. K., Zweng, M. M., Reagan, J. R., and Johnson, D. R.: World Ocean Atlas 2013, Volume 4 : Dissolved Inorganic Nutrients (phosphate, nitrate, silicate), NOAA Atlas NESDIS 76, 4, 25, <https://doi.org/10.1182/blood-2011-06-357442>, 2013.
- Goddijn-Murphy, L., Woolf, D. K., and Marandino, C.: Space-based retrievals of air-sea gas transfer velocities using altimeters: Calibration for dimethyl sulfide, *J GEOPHYS RES: OCEANS*, 117, 2012.
- Gregor, L., Kok, S., and Monteiro, P. M.: Empirical methods for the estimation of Southern Ocean CO<sub>2</sub>: Support vector and random forest regression, *Biogeosciences*, 14, 5551–5569, <https://doi.org/10.5194/bg-14-5551-2017>, 2017.
- Gypens, N., Borges, A. V., Speeckaert, G., and Lancelot, C.: The dimethylsulfide cycle in the eutrophied Southern North Sea: A model study integrating phytoplankton and bacterial processes, *PLoS ONE*, 9, <https://doi.org/10.1371/journal.pone.0085862>, 2014.
- Humphries, G. R., Deal, C. J., Elliott, S., and Huettmann, F.: Spatial predictions of sea surface dimethylsulfide concentrations in the high arctic, *Biogeochemistry*, 110, 287–301, 2012.
- Kettle, A. J., Andreae, M. O., Amouroux, D., Andreae, T. W., Bates, T. S., Berresheim, H., Bingemer, H., Boniforti, R., Curran, M. A., DiTullio, G. R., Helas, G., Jones, G. B., Keller, M. D., Kiene, R. P., Leek, C., Levasseur, M., Malin, G., Maspero, M., Matrai, P., McTaggart, A. R., Mihalopoulos, N., Nguyen, B. C., Novo, A., Putaud, J. P., Rapsomanikis, S., Roberts, G., Schebeske, G., Sharma, S., Simó, R., Staubes, R., Turner, S., and Uher, G.: A global database of sea surface dimethylsulfide (DMS) measurements and a procedure to predict sea surface DMS as a function of latitude, longitude, and month, *Global Biogeochem. Cycles*, 13, 399–444, <https://doi.org/10.1029/1999GB900004>, 1999.
- Kiene, R. P., Linn, L. J., and Bruton, J. A.: New and important roles for DMSP in marine microbial communities, *J. Sea Res.*, 43, 209–224, 2000.
- Lana, A., Bell, T. G., Simó, R., Vallina, S. M., Ballabrera-Poy, J., Kettle, A. J., Dachs, J., Bopp, L., Saltzman, E. S., Stefels, J., Johnson, J. E., and Liss, P. S.: An updated climatology of surface dimethylsulfide concentrations and emission fluxes in the global ocean, *Global Biogeochem. Cycles*, 25, <https://doi.org/10.1029/2010GB003850>, 2011.
- Le Clainche, Y., Vézina, A., Levasseur, M., Cropp, R. A., Gunson, J. R., Vallina, S. M., Vogt, M., Lancelot, C., Allen, J. I., Archer, S. D., et al.: A first appraisal of prognostic ocean DMS models and prospects for their use in climate models, *Global biogeochemical cycles*, 24, 2010.
- Liss, P. S.: Flux of gases across the air-sea interface, *Nature*, 247, 181–184, 1974.
- Livingstone, D. M. and Imboden, D. M.: The non-linear influence of wind-speed variability on gas transfer in lakes, *Tellus B: Chemical and Physical Meteorology*, 45, 275–295, 1993.
- Longhurst, A. R.: *Ecological geography of the sea*, Elsevier, 1998.
- McGillis, W., Dacey, J., Frew, N., Bock, E., and Nelson, R.: Water-air flux of dimethylsulfide, *J GEOPHYS RES: OCEANS*, 105, 1187–1193, 2000.

- McParland, E. L. and Levine, N. M.: The role of differential DMSP production and community composition in predicting variability of  
525 global surface DMSP concentrations, *Limnology and Oceanography*, 64, 757–773, 2019.
- Moran, M. A., Reisch, C. R., Kiene, R. P., and Whitman, W. B.: Genomic insights into bacterial DMSP transformations, *Annual review of  
marine science*, 4, 523–542, 2012.
- Morel, A., Huot, Y., Gentili, B., Werdell, P. J., Hooker, S. B., and Franz, B. A.: Examining the consistency of products derived from various  
ocean color sensors in open ocean (Case 1) waters in the perspective of a multi-sensor approach, *Remote Sensing of Environment*, 111,  
530 69–88, 2007.
- NASA: SeaWinds on QuickSCAT Level 3 surface wind speed for climate model comparison, Ver. 1. PO.DAAC, CA, USA,  
<https://doi.org/https://doi.org/10.5067/QSSWS-CMIP1>, 2012.
- NASA: Goddard Space Flight Center, Ocean Ecology Laboratory, Ocean Biology Processing Group, Sea-viewing Wide Field-of-view Sensor  
(SeaWiFS) Chlorophyll Data, <https://doi.org/data/10.5067/ORBVIEW-2/SEAWIFS/L3M/CHL/2018>, 2018.
- 535 Neukermans, G., Oziel, L., and Babin, M.: Increased intrusion of warming Atlantic water leads to rapid expansion of temperate phytoplankton  
in the Arctic, *Global change biology*, 24, 2545–2553, 2018.
- Nightingale, P. D., Malin, G., Law, C. S., Watson, A. J., Liss, P. S., Liddicoat, M. I., Boutin, J., and Upstill-Goddard, R. C.: In situ evaluation  
of air-sea gas exchange parameterizations using novel conservative and volatile tracers, *Global Biogeochem. Cycles*, 14, 373–387, 2000.
- Osman, M. B., Das, S. B., Trusel, L. D., Evans, M. J., Fischer, H., Grieman, M. M., Kipfstuhl, S., McConnell, J. R., and Saltzman, E. S.:  
540 Industrial-era decline in subarctic Atlantic productivity, *Nature*, 569, 551, 2019.
- Rafter, P., Bagnell, A., Marconi, D., and Devries, T.: Global trends in marine nitrate N isotopes from observations and a neural network-based  
climatology, *Biogeosciences*, 16, 2617–2633, <https://doi.org/10.5194/bg-16-2617-2019>, 2019.
- Roshan, S. and DeVries, T.: Efficient dissolved organic carbon production and export in the oligotrophic ocean, *Nature communications*, 8,  
2036, 2017.
- 545 Royer, S.-J., Galí, M., Mahajan, A., Ross, O. N., Pérez, G., Saltzman, E. S., and Simó, R.: A high-resolution time-depth view of dimethyl-  
sulphide cycling in the surface sea, *Scientific reports*, 6, 32325, 2016.
- Saltzman, E., King, D., Holmen, K., and Leck, C.: Experimental determination of the diffusion coefficient of dimethylsulfide in water, *J  
GEOPHYS RES-OCEANS*, 98, 16481–16486, 1993.
- Sathyendranath, S., Stuart, V., Nair, A., Oka, K., Nakane, T., Bouman, H., Forget, M.-H., Maass, H., and Platt, T.: Carbon-to-chlorophyll  
550 ratio and growth rate of phytoplankton in the sea, *Marine Ecology Progress Series*, 383, 73–84, 2009.
- Schmidtko, S., Johnson, G. C., and Lyman, J. M.: MIMOC: A global monthly isopycnal upper-ocean climatology with mixed layers, *J.  
Geophys. Res.: Oceans*, 118, 1658–1672, 2013.
- Simó, R.: Production of atmospheric sulfur by oceanic plankton: Biogeochemical, ecological and evolutionary links, *Trends in Ecology and  
Evolution*, 16, 287–294, [https://doi.org/10.1016/S0169-5347\(01\)02152-8](https://doi.org/10.1016/S0169-5347(01)02152-8), 2001.
- 555 Simó, R. and Dachs, J.: Global ocean emission of dimethylsulfide predicted from biogeophysical data, *Global Biogeochem. Cycles*, 16, 26–1,  
2002.
- Simó, R. and Pedrós-Alió, C.: Short-term variability in the open ocean cycle of dimethylsulfide, *Global Biogeochem. Cycles*, 13, 1173–1181,  
1999.
- Stefels, J.: Physiological aspects of the production and conversion of DMSP in marine algae and higher plants, *J. Sea Res.*, 43, 183–197,  
560 [https://doi.org/10.1016/S1385-1101\(00\)00030-7](https://doi.org/10.1016/S1385-1101(00)00030-7), 2000.

- Stefels, J., Steinke, M., Turner, S., Malin, G., and Belviso, S.: Environmental constraints on the production and removal of the climatically active gas dimethylsulphide (DMS) and implications for ecosystem modelling, *Biogeochemistry*, 83, 245–275, 2007.
- Stefels, J., Carnat, G., Dacey, J. W., Goossens, T., Elzenga, J. T. M., and Tison, J.-L.: The analysis of dimethylsulfide and dimethylsulfoniopropionate in sea ice: Dry-crushing and melting using stable isotope additions, *Marine chemistry*, 128, 34–43, 2012.
- 565 Sunda, W. G., Kieber, D., and Kiene, R. P.: An antioxidant function of DMSP and DMS in marine algae, *Nature*, 418, 317–320, <https://doi.org/10.1038/nature00851>, 2002.
- Tesdal, J.-E., Christian, J. R., Monahan, A. H., and von Salzen, K.: Evaluation of diverse approaches for estimating sea-surface DMS concentration and air–sea exchange at global scale, *Environmental Chemistry*, 13, 390–412, 2016.
- Thomas, D. and Dieckmann, G.: Antarctic sea ice—a habitat for extremophiles, *Science*, 295, 641–644, 2002.
- 570 Toole, D., Slezak, D., Kiene, R., Kieber, D., and Siegel, D.: Effects of solar radiation on dimethylsulfide cycling in the western Atlantic Ocean, *DEEP-SEA RES PT I*, 53, 136–153, 2006.
- Toole, D. A. and Siegel, D. A.: Light-driven cycling of dimethylsulfide (DMS) in the Sargasso Sea: Closing the loop, *Geophys Res Lett*, 31, 2004.
- Vallina, S. M. and Simó, R.: Strong Relationship Between DMS and the Solar Radiation Dose over, *Science*, 315, 506–509, <https://doi.org/10.1126/science.1133680>, 2007.
- 575 Vogt, M., Vallina, S. M., Buitenhuis, E. T., Bopp, L., and Le Quéré, C.: Simulating dimethylsulphide seasonality with the Dynamic Green Ocean Model PlankTOM5, *J. Geophys. Res.*, 115, C06 021, <https://doi.org/10.1029/2009JC005529>, 2010.
- Wang, S. and Moore, J. K.: Incorporating Phaeocystis into a Southern Ocean ecosystem model, *J. Geophys. Res.*, 116, C01 019, <https://doi.org/10.1029/2009JC005817>, 2011.
- 580 Wang, S., Elliott, S., Maltrud, M., and Cameron-Smith, P.: Influence of explicit Phaeocystis parameterizations on the global distribution of marine dimethyl sulfide, *J. Geophys. Res.: Biogeosciences*, 120, 2158–2177, <https://doi.org/10.1002/2015JG003017>, 2015.
- Wang, W.-L., Moore, J. K., Martiny, A. C., and Primeau, F. W.: Convergent estimates of marine nitrogen fixation, *Nature*, 566, 205–211, 2019.
- Webb, A. v., van Leeuwe, M., den Os, D., Meredith, M., Venables, H., and Stefels, J.: Extreme spikes in DMS flux double estimates of biogenic sulfur export from the Antarctic coastal zone to the atmosphere, *Scientific reports*, 9, 1–11, 2019.
- 585 Yang, G. P., Liu, X. T., Li, L., and Zhang, Z. B.: Biogeochemistry of dimethylsulfide in the South China Sea, *Journal of Marine Research*, 57, 189–211, <https://doi.org/10.1357/002224099765038616>, 1999.

**Table 1.** Results of linear regression models. The  $R^2$  values are for log transformed, and normalized data as described in the text.

| Parameter | in situ data |       |        | PMEL  |       |        | PMEL+NAAMES |       |        |
|-----------|--------------|-------|--------|-------|-------|--------|-------------|-------|--------|
|           | $R^2$        | Slope | No.    | $R^2$ | Slope | No.    | $R^2$       | Slope | No.    |
| DMSPt     | 0.41         | 0.77  | 4,061  | -     | -     | -      | -           | -     | -      |
| Chl $a^1$ | 0.21         | 0.43  | 10,404 | 0.09  | 0.30  | 81,767 | 0.09        | 0.29  | 88,516 |
| MLD       | -            | -     | -      | 0.06  | -0.25 | 81,646 | 0.07        | -0.26 | 88,214 |
| PAR       | -            | -     | -      | 0.07  | 0.26  | 82,137 | 0.09        | 0.29  | 88,923 |
| SST       | $\sim 0$     | -0.01 | 69,196 | 0.02  | -0.12 | 82,770 | 0.01        | -0.12 | 89,556 |
| SSS       | $\sim 0$     | -0.08 | 69,196 | 0.01  | -0.10 | 82,759 | 0.02        | -0.13 | 89,545 |
| DIP       | -            | -     | -      | 0.01  | 0.11  | 81,868 | 0.02        | 0.12  | 88,654 |
| DIN       | -            | -     | -      | 0.01  | 0.10  | 79,083 | $\sim 0$    | 0.09  | 85,865 |
| SiO       | -            | -     | -      | 0.04  | 0.19  | 81,813 | 0.04        | 0.20  | 88,599 |



**Table 2.** Annually-averaged zonal mean DMS flux (Tg S/yr) for this study (W20), Lana et al. (2011) (L11), Simó and Dachs (2002)(SD02), Vallina and Simó (2007)[VS07], and Galí et al. (2018)[Gali18] for their four parameterization models. L11, SD02, VS07, and Gali18 are computed with the Nightingale et al. (2000) parameterization of the piston velocity[N00]. Flux in this study is calculated using both the Nightingale et al. (2000)[N00], and Goddijn-Murphy et al. (2012)[GM12], parameterizations. Uncertainties are estimated based on top 10 models with different parameterizations. Errorbars correspond to  $\pm 1\sigma$ .

| Latitude | L11[N00] | SD02[N00] | VS07[N00] | Gali18[N00] | W20[N00]   | W20[GM12]  |
|----------|----------|-----------|-----------|-------------|------------|------------|
| 90°-80°N | 0.00     | 0.00      | 0.00      | 0.00± 0.00  | 0.00±0.00  | 0.00±0.00  |
| 80°-70°N | 0.08     | 0.04      | 0.02      | 0.02± 0.00  | 0.05±0.01  | 0.04±0.01  |
| 70°-60°N | 0.19     | 0.11      | 0.06      | 0.09± 0.01  | 0.13±0.01  | 0.11±0.01  |
| 60°-50°N | 0.78     | 0.52      | 0.30      | 0.38± 0.04  | 0.45±0.03  | 0.35±0.03  |
| 50°-40°N | 1.16     | 1.01      | 0.81      | 0.73± 0.08  | 0.79±0.06  | 0.60±0.05  |
| 40°-30°N | 1.39     | 1.64      | 1.85      | 1.18± 0.07  | 1.13±0.05  | 0.90±0.04  |
| 30°-20°N | 1.43     | 1.89      | 2.84      | 1.33± 0.02  | 1.29±0.05  | 1.07±0.04  |
| 20°-10°N | 2.60     | 2.79      | 4.29      | 1.96± 0.07  | 2.12±0.09  | 1.68±0.07  |
| 10°-0°N  | 2.91     | 2.64      | 3.55      | 1.66± 0.03  | 2.11±0.10  | 1.79±0.08  |
| 00°-10°S | 2.90     | 2.40      | 3.54      | 1.84± 0.01  | 2.23±0.13  | 1.91±0.11  |
| 10°-20°S | 3.42     | 2.64      | 4.35      | 2.05± 0.02  | 2.41±0.13  | 1.93±0.11  |
| 20°-30°S | 2.91     | 2.26      | 3.74      | 1.87± 0.02  | 1.93±0.12  | 1.56±0.10  |
| 30°-40°S | 2.91     | 2.42      | 3.00      | 2.19± 0.08  | 2.20±0.19  | 1.71±0.14  |
| 40°-50°S | 2.70     | 2.19      | 2.18      | 2.07± 0.14  | 2.19±0.16  | 1.51±0.11  |
| 50°-60°S | 1.67     | 1.00      | 0.10      | 0.76± 0.07  | 1.01±0.07  | 0.67±0.05  |
| 60°-70°S | 0.18     | 0.08      | 0.08      | 0.04± 0.00  | 0.09±0.01  | 0.06±0.01  |
| 70°-80°S | 0.00     | 0.00      | 0.00      | 0.00± 0.00  | 0.00±0.00  | 0.00±0.00  |
| 80°-90°S | 0.00     | 0.00      | 0.00      | 0.00± 0.00  | 0.00±0.00  | 0.00±0.00  |
| Total    | 27.23    | 23.64     | 31.59     | 18.18± 0.52 | 20.12±0.43 | 15.89±0.34 |

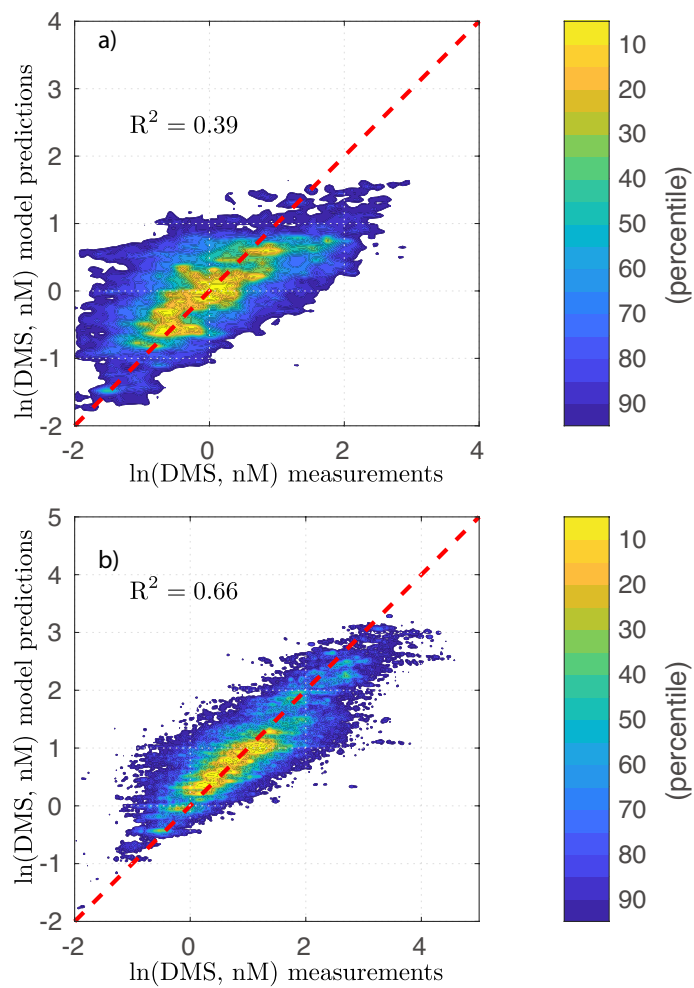

**Figure 1.** Model versus observation plots on logarithmic scale: (a) multilinear regression model; (b) artificial neural network model. The color indicates the fraction of the joint distribution explained as a percentile that falls within a region of concentration space.

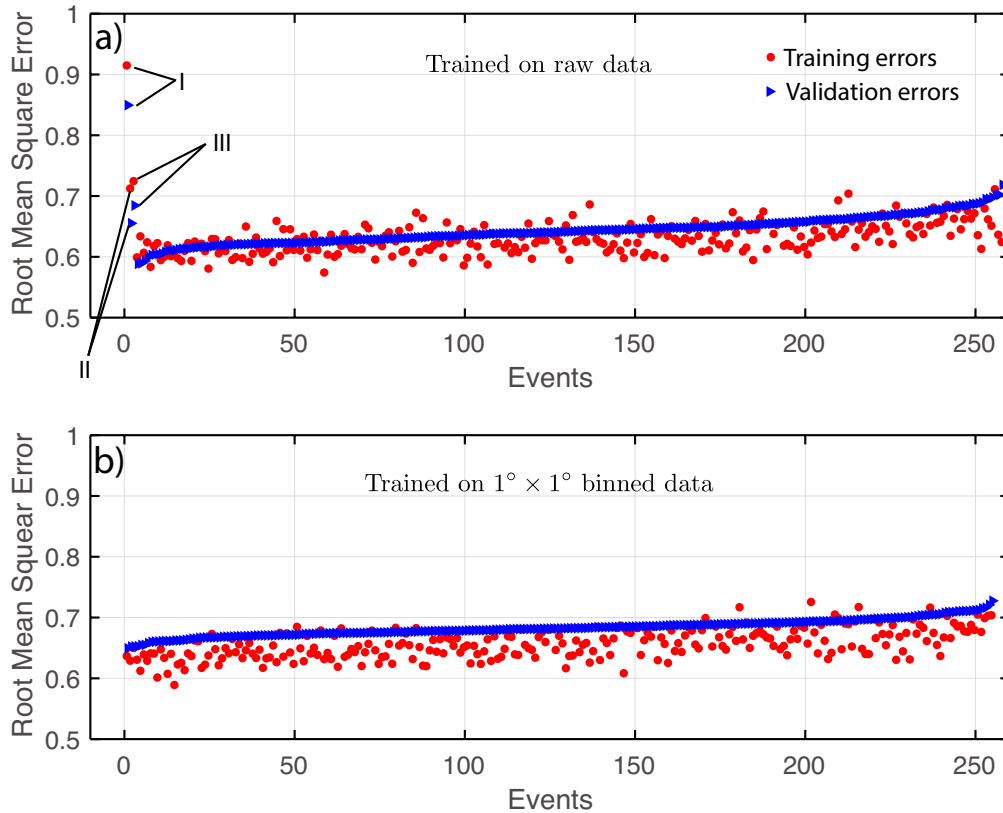

**Figure 2.** Parameter sensitivity tests on raw and binned data. (a) Root mean square error on logarithmic scale for the model trained using raw data; (b) Root mean square error on logarithmic scale for the model trained using binned data. The time and location parameters are tested separately without combining with environmental parameters as shown in the upper panel, (I) with only location parameters; (II) with location and day of year parameters; and (III) with location, day of year, and time of day parameters. The model with three location parameters (I) has a root mean square error on natural logarithmic scale of  $\sim 0.83$ , which decreases to  $\sim 0.65$  by adding sampling day of year parameters (II), however, increases to  $\sim 0.67$  by adding sampling time parameters (III). We, therefore, do not include sampling time parameters in the following tests. We tested every combination of the eight parameters (PAR, MLD, SST, SAL, Chl *a*, DIP, DIN, and SiO), which in total are 255 tests.

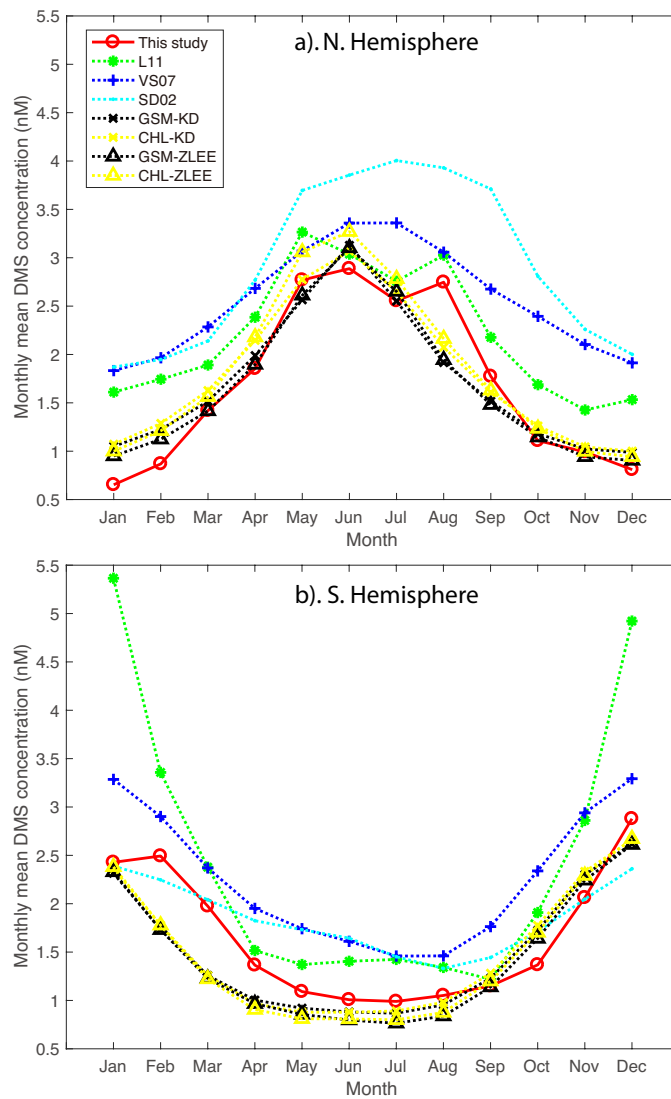

**Figure 3.** Comparisons of monthly mean DMS concentrations to previous studies (Simó and Dachs, 2002; Vallina and Simó, 2007; Lana et al., 2011; Galí et al., 2018). L11, SD02, and VS07 are self-explanatory. GSM-KD, CHL-KD, GSM-ZLEE, and CHL-ZLEE are the four model results from Galí et al. (2018).

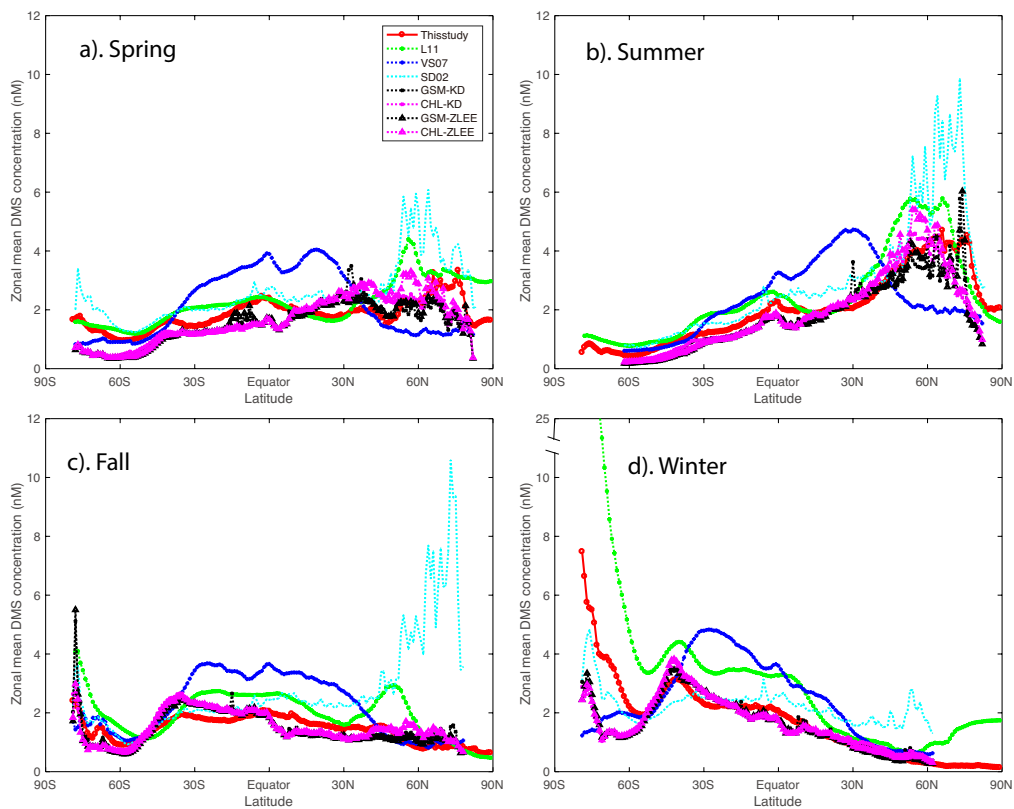

**Figure 4.** Comparisons of zonally mean DMS concentrations to previous studies (Simó and Dachs, 2002; Vallina and Simó, 2007; Lana et al., 2011; Galí et al., 2018). L11, SD02, and VS07 are self-explanatory. GSM-KD, CHL-KD, GSM-ZLEE, and CHL-ZLEE are the four model results from Galí et al. (2018).

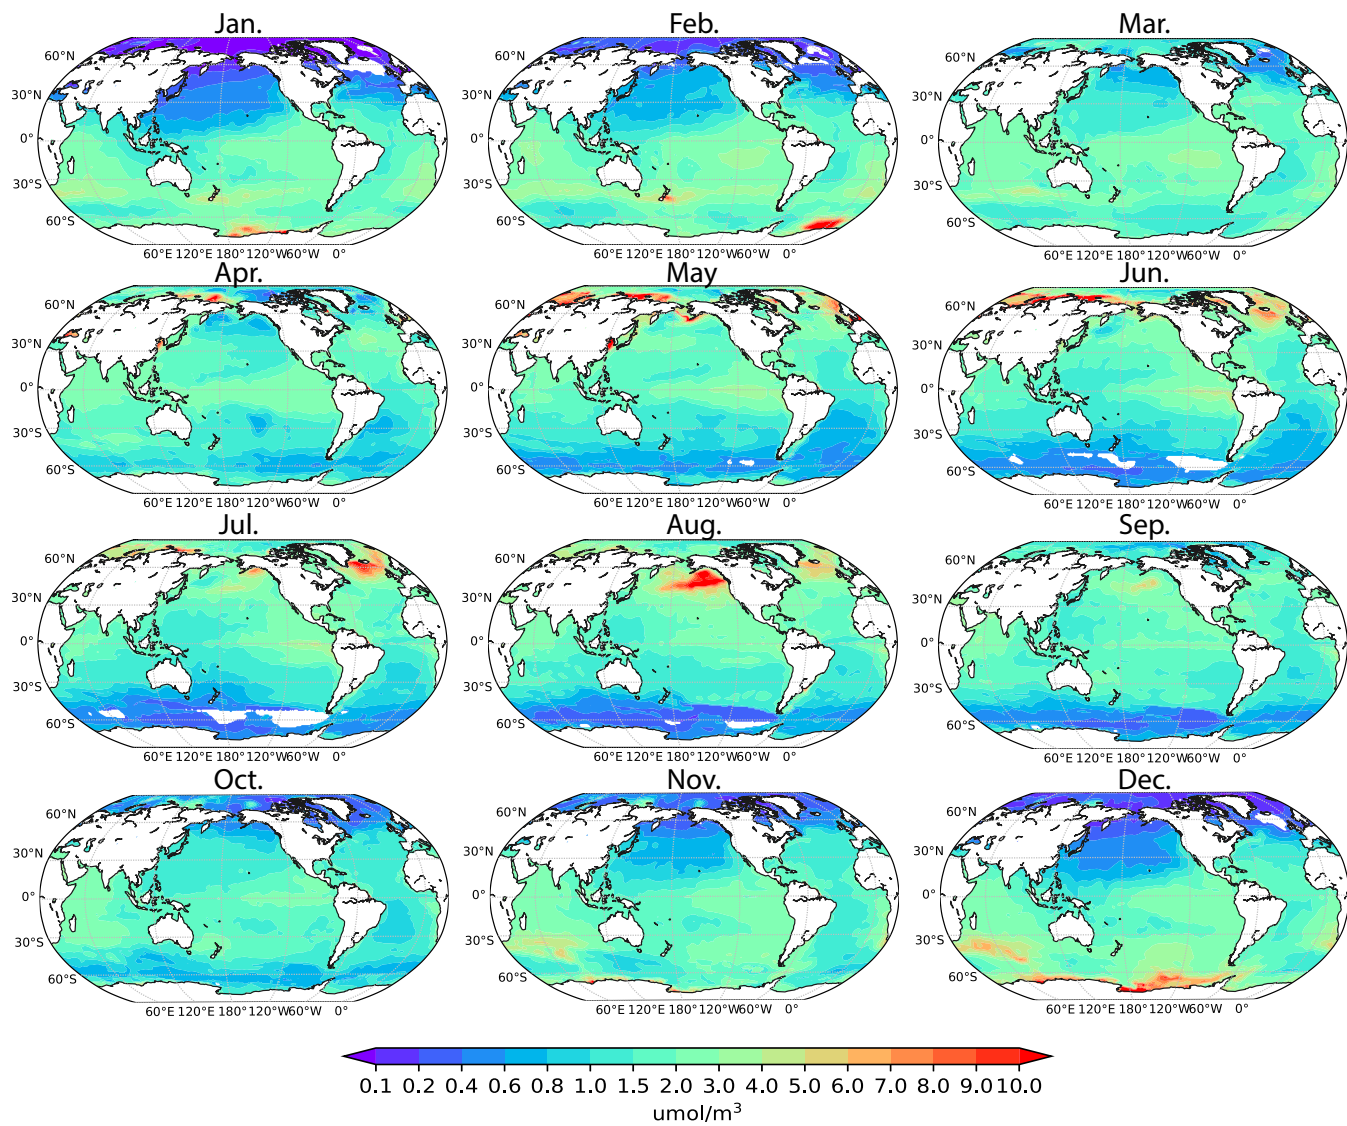

**Figure 5.** Monthly DMS concentration ( $\mu\text{mol m}^{-3}$ ) estimated based on artificial neural network.

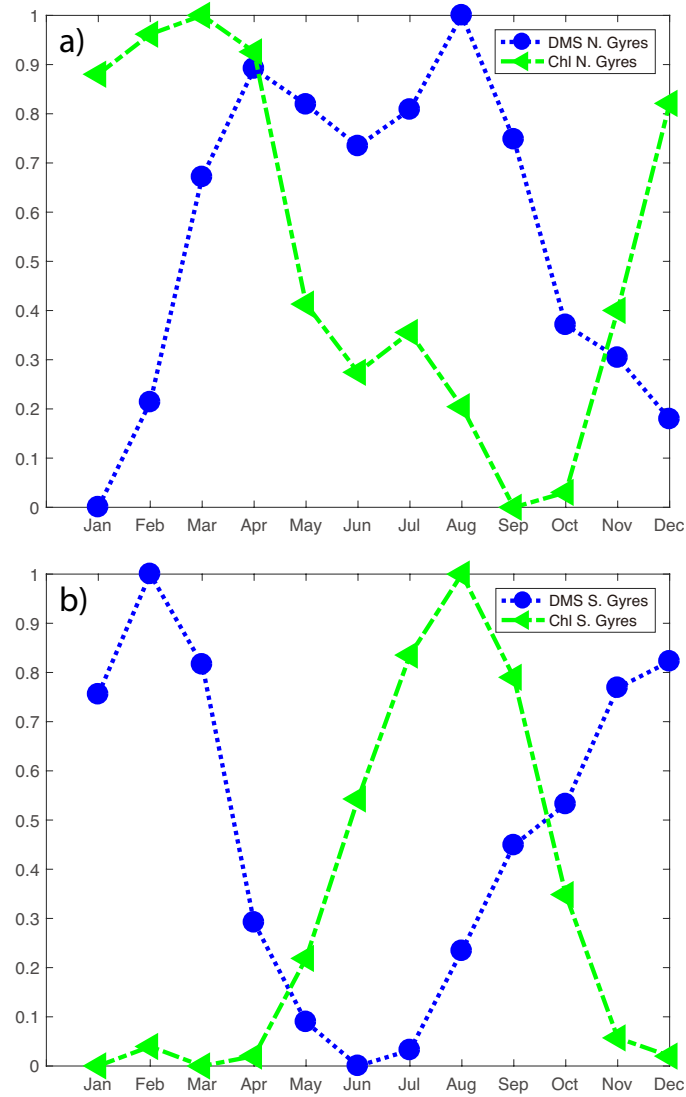

**Figure 6.** Distributions of monthly mean DMS and Chl-*a* concentrations for N. and S. hemisphere gyres. The gyres are defined as regions between 30° and equator where annually mean DIP concentration is below 0.2  $\mu\text{M}$ . Monthly mean concentrations are normalized to the range of 0 to 1.

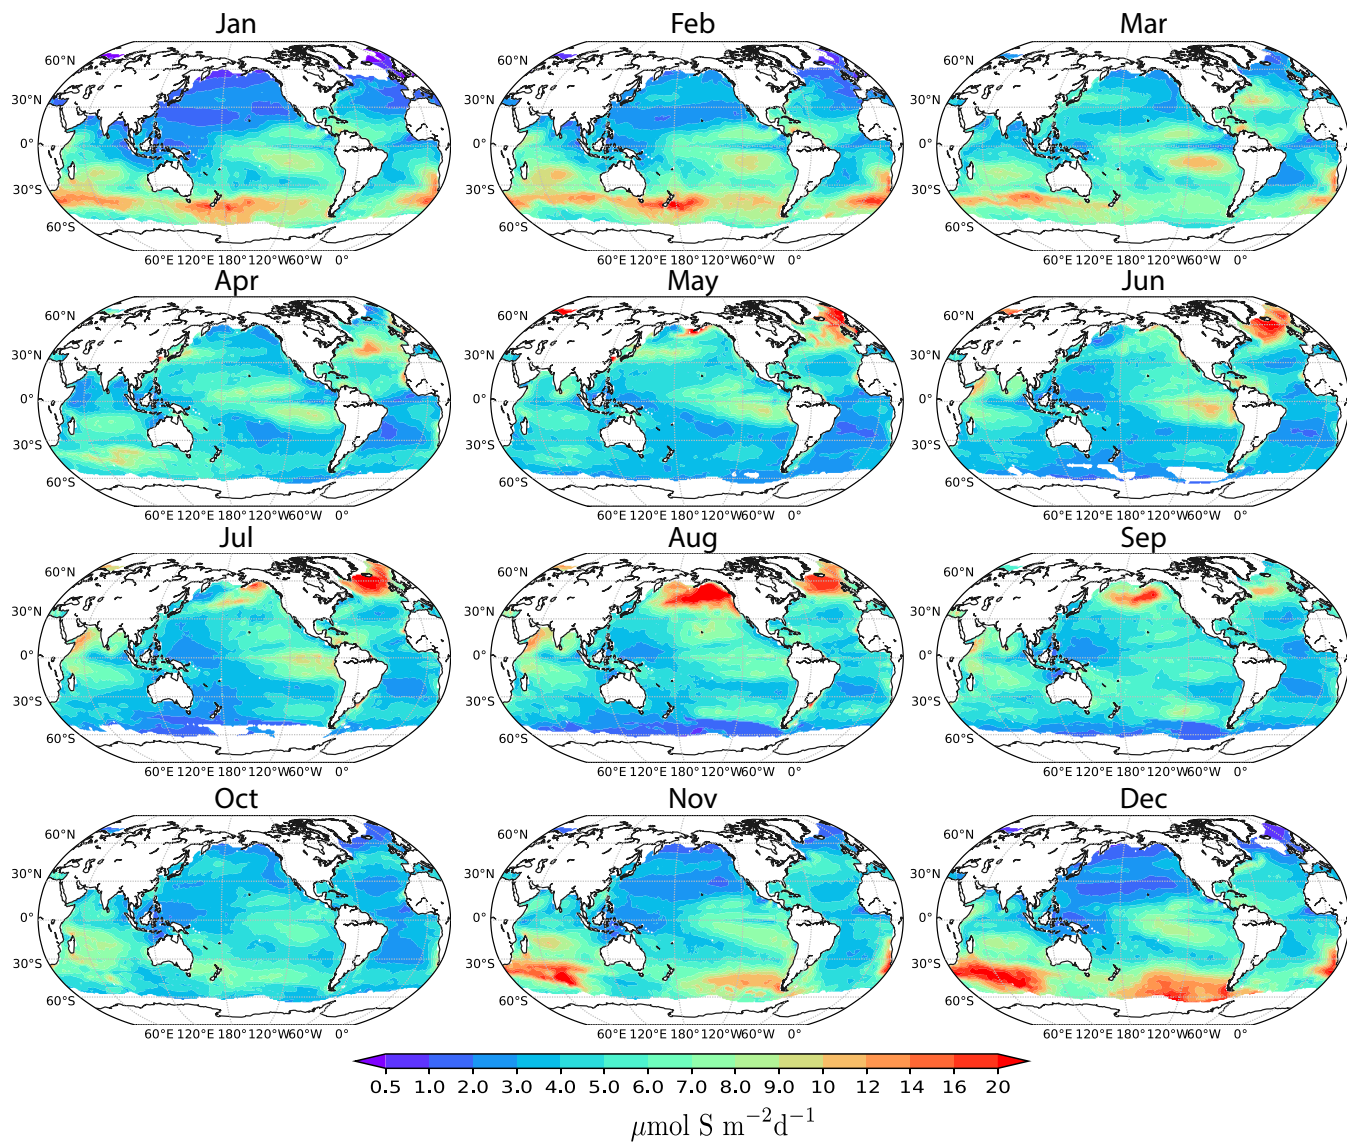

**Figure 7.** Monthly DMS flux ( $\mu\text{mol S m}^{-2} \text{ day}^{-1}$ ) calculated based on DMS climatology estimated from the ANN model and Goddijn-Murphy et al. (2012) flux parameterization.



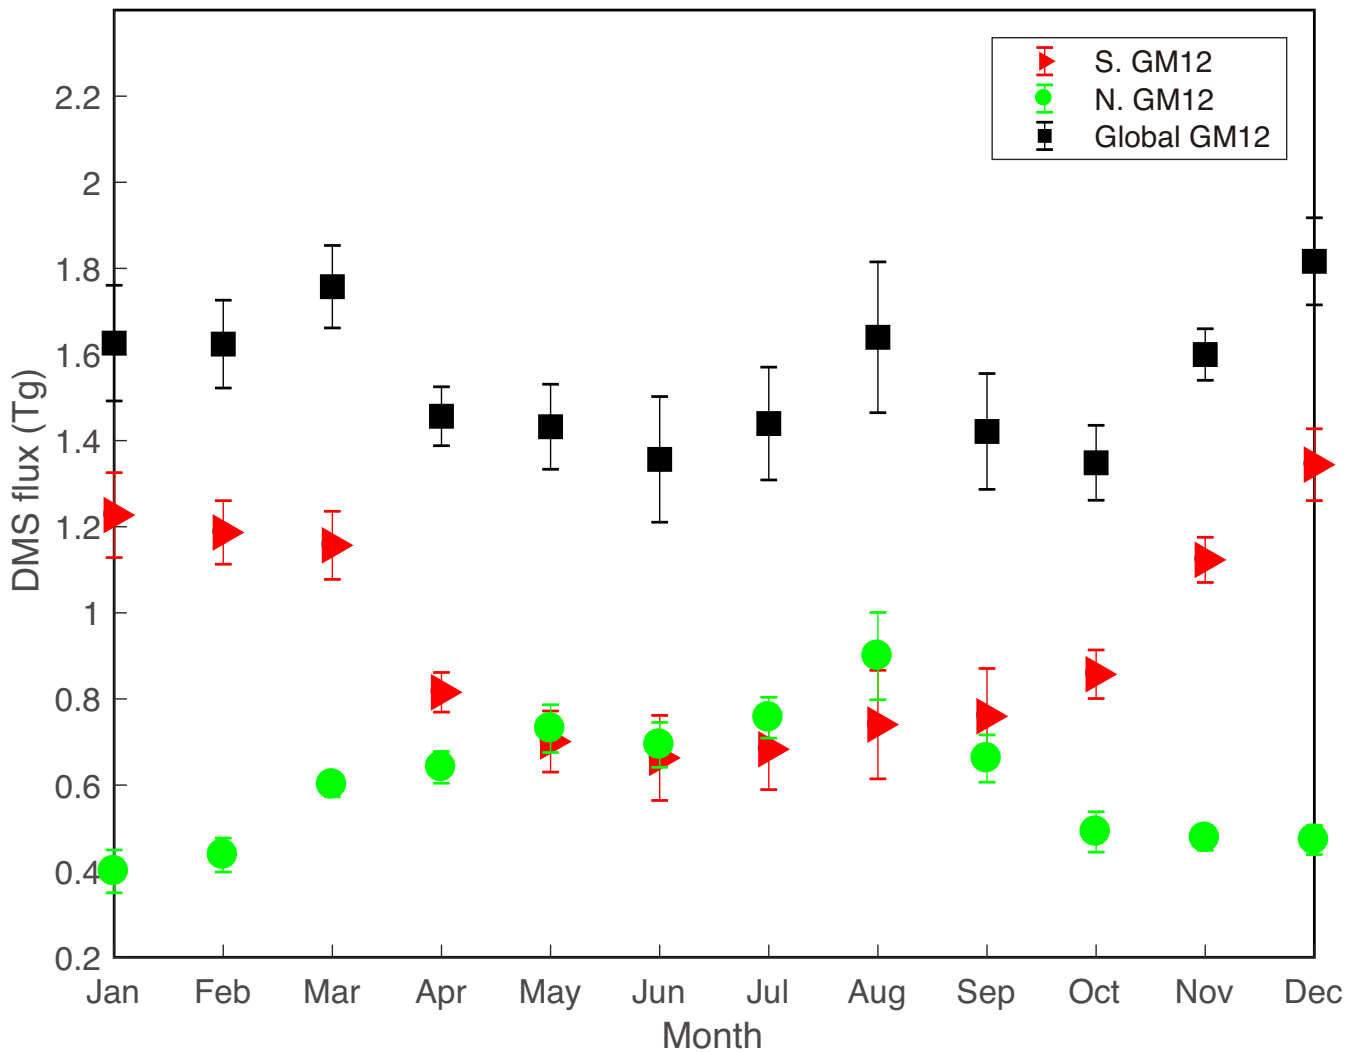

**Figure 8.** Area and month integrated DMS sea-to-air flux ( $\text{Tg S month}^{-1}$ ) based on GM12 parameterization. Red triangles represent monthly mean flux of the Southern hemisphere, green dots represent monthly mean flux of the Northern hemisphere, and black squares represent globally monthly mean flux. Uncertainties are estimated based on top 10 models with different parameter combinations. Errorbars correspond to  $\pm 1\sigma$ .

**Table A1.** DMS and ancillary data sources.

| Variables        | Sources                                                                                                 | units                                   | References                |
|------------------|---------------------------------------------------------------------------------------------------------|-----------------------------------------|---------------------------|
| DMS <sup>1</sup> | <a href="http://saga.pmel.noaa.gov/dms/">http://saga.pmel.noaa.gov/dms/</a>                             | nM                                      | (Kettle et al., 1999)     |
| DMS <sup>2</sup> | NAAMES                                                                                                  | nM                                      | (Behrenfeld et al., 2019) |
| Chl              | <a href="https://oceandata.sci.gsfc.nasa.gov/SeaWiFS/">https://oceandata.sci.gsfc.nasa.gov/SeaWiFS/</a> | $\mu\text{g L}^{-1}$                    | (NASA, 2018)              |
| MLD              | <a href="https://www.pmel.noaa.gov/mimoc/">https://www.pmel.noaa.gov/mimoc/</a>                         | m                                       | (Schmidtko et al., 2013)  |
| PAR              | <a href="https://oceancolor.gsfc.nasa.gov/atbd/par/">https://oceancolor.gsfc.nasa.gov/atbd/par/</a>     | Einsteins $\text{m}^{-2} \text{d}^{-1}$ | (Frouin et al., 2012)     |
| WSP              | <a href="https://podaac.jpl.nasa.gov/dataset">https://podaac.jpl.nasa.gov/dataset</a>                   | $\text{m s}^{-1}$                       | (NASA, 2012)              |
| SST              | WOA2013                                                                                                 | C                                       | (Garcia et al., 2013)     |
| SSS              | WOA2013                                                                                                 | psu                                     | (Garcia et al., 2013)     |
| DIP              | WOA2013                                                                                                 | $\mu\text{M}$                           | (Garcia et al., 2013)     |
| DIN              | WOA2013                                                                                                 | $\mu\text{M}$                           | (Garcia et al., 2013)     |
| SiO              | WOA2013                                                                                                 | $\mu\text{M}$                           | (Garcia et al., 2013)     |
| ICE              | CESM model                                                                                              | -                                       | (Wang et al., 2019)       |

<sup>1</sup> Data from the online database. <sup>2</sup> New data from the North Atlantic Aerosol and Marine Ecosystems experiment.

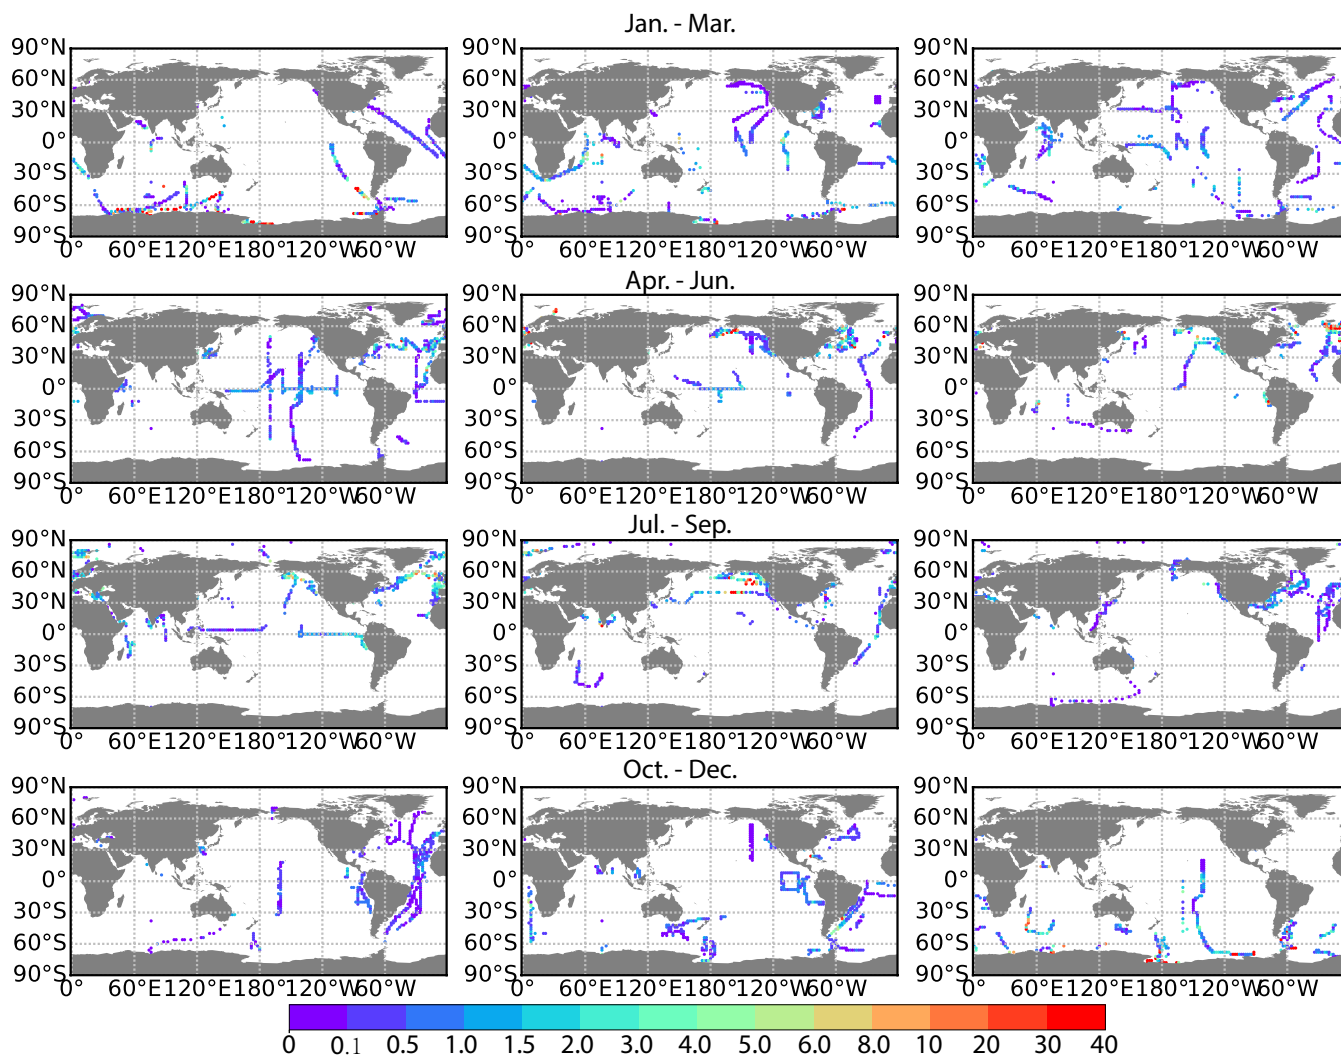

**Figure A1.** Distribution of DMS observations partitioned into each month. The color indicates DMS concentration (nM).

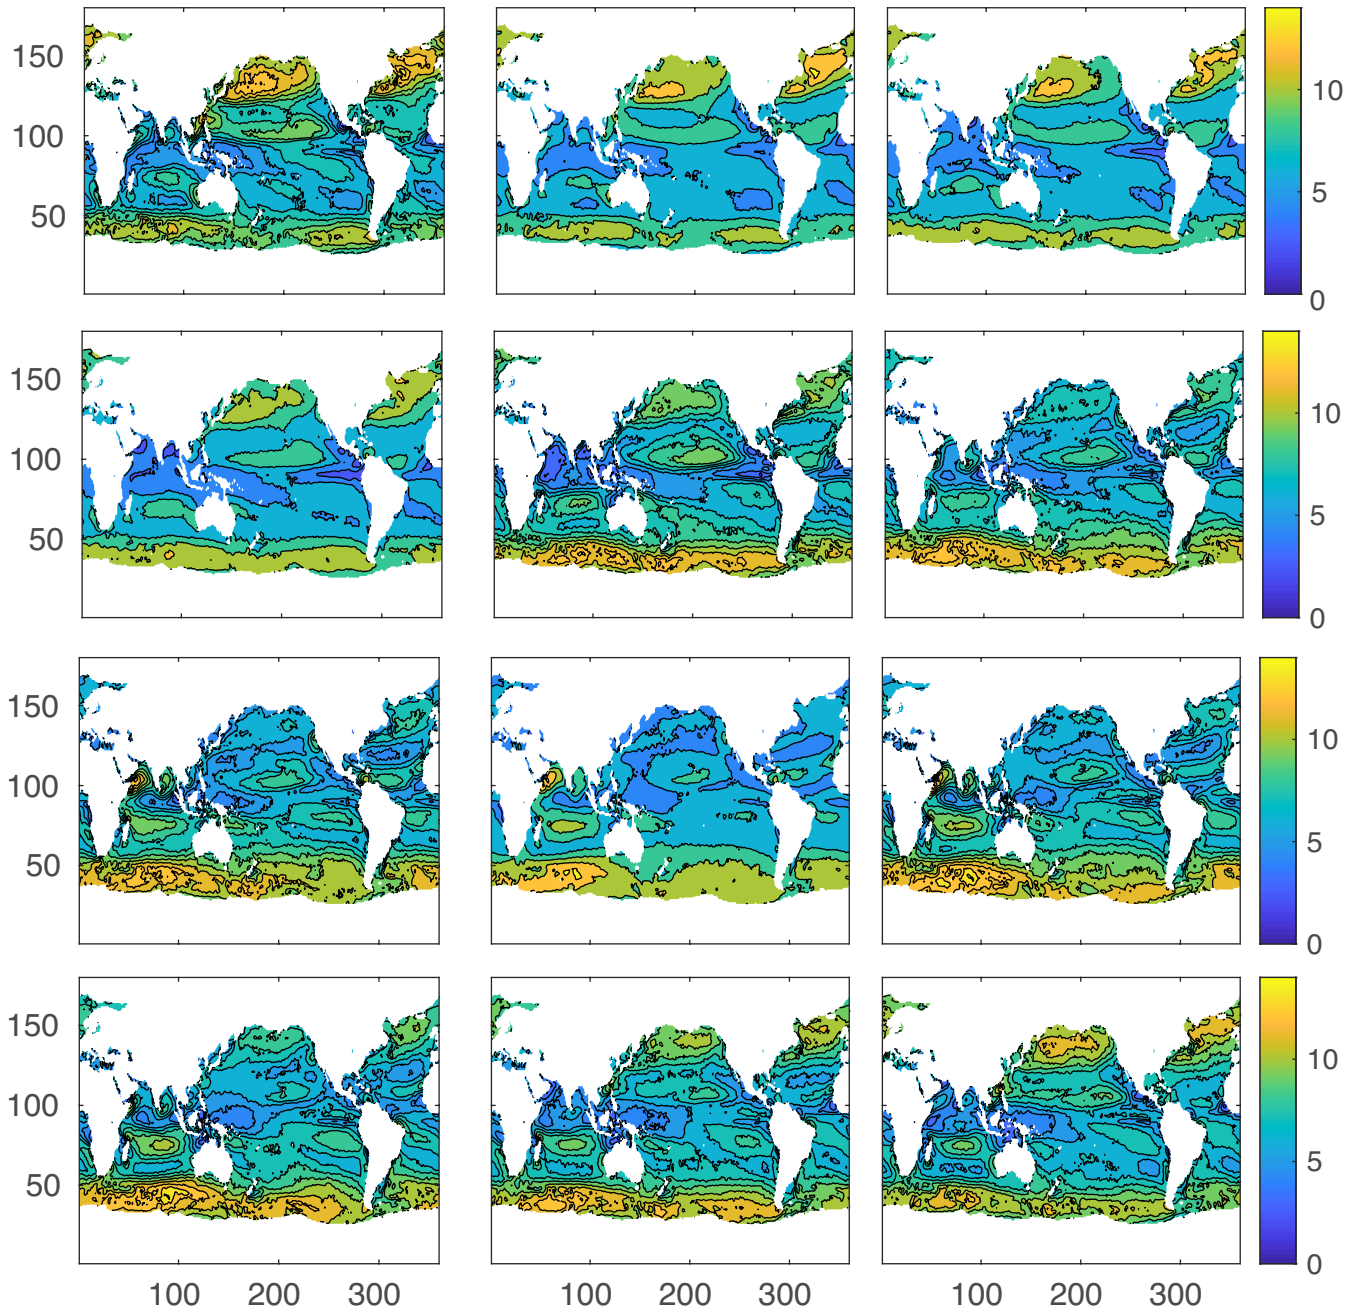

**Figure A2.** Climatological wind speed (m s<sup>-1</sup>).
